1 **Fate and plasticity of SARS-CoV-2-specific B cells**  
2 **during memory and recall response in humans**

3

4 Yves Zurbuchen,<sup>1,5</sup> Jan Michler,<sup>2,5</sup> Patrick Taeschler,<sup>1</sup> Sarah Adamo,<sup>1</sup> Carlo Cervia,<sup>1</sup>

5 Miro E. Raeber,<sup>1</sup> Ilhan E. Acar,<sup>2</sup> Jakob Nilsson,<sup>1</sup> Michael B. Soyka,<sup>3</sup> Andreas E.

6 Moor,<sup>2\*</sup> and Onur Boyman<sup>1,4\*</sup>

7

8 <sup>1</sup> Department of Immunology, University Hospital Zurich, Schmelzbergstrasse 26, 8091

9 Zurich, Switzerland

10 <sup>2</sup> Department of Biosystems Science and Engineering, ETH Zurich, Mattenstrasse 26,

11 4058 Basel, Switzerland

12 <sup>3</sup> Department of Otorhinolaryngology, Head and Neck Surgery, University and

13 University Hospital Zurich, Frauenklinikstrasse 24, 8091 Zurich, Switzerland

14 <sup>4</sup> Faculty of Medicine and Faculty of Science, Ramistrasse 71, University of Zurich,

15 8006 Zurich, Switzerland

16 <sup>5</sup> These authors contributed equally

17

18 \* Corresponding authors: Onur Boyman, MD, Department of Immunology, University

19 Hospital Zurich, Schmelzbergstrasse 26, 8091 Zurich, Switzerland, e-mail:

20 [onur.boyman@uzh.ch](mailto:onur.boyman@uzh.ch); Andreas Moor, MD, PhD, Department of Biosystems Science

21 and Engineering, ETH Zurich, Mattenstrasse 26, 4058 Basel, Switzerland, e-mail:

22 [andreas.moor@bsse.ethz.ch](mailto:andreas.moor@bsse.ethz.ch).

23

## 24 **Abstract**

25 B cell responses to different pathogens recruit tailored effector mechanisms, resulting  
26 in functionally specialized subsets. For human memory B cells (MBCs), these include  
27 CD21<sup>+</sup> resting, CD21<sup>-</sup>CD27<sup>+</sup> activated, and CD21<sup>-</sup>CD27<sup>-</sup> atypical cells. Whether these  
28 subsets follow deterministic or interconnected fates is unknown. We demonstrate in  
29 COVID-19 patients that single clones of SARS-CoV-2-specific MBCs followed  
30 multiple fates with distinctive phenotypic and functional characteristics. 6–12 months  
31 after infection, most circulating MBCs were CD21<sup>+</sup> resting cells, which also  
32 accumulated in peripheral lymphoid organs where they acquired markers of tissue  
33 residency. Conversely, at acute infection and following SARS-CoV-2-specific  
34 immunization, CD21<sup>-</sup> MBCs became the predominant subsets, with atypical MBCs  
35 expressing high T-bet, inhibitory molecules, and distinct chemokine receptors. B cell  
36 receptor sequencing allowed tracking of individual MBC clones differentiating into  
37 CD21<sup>+</sup>, CD21<sup>-</sup>CD27<sup>+</sup>, and CD21<sup>-</sup>CD27<sup>-</sup> cell fates. Collectively, single MBC clones  
38 can adopt functionally different trajectories, thus contributing to immunity to infection.  
39

## 40 INTRODUCTION

41 Upon encounter with cognate antigens, B and T lymphocytes are endowed with the  
42 capacity to form memory cells<sup>1,2</sup>. Memory lymphocytes are usually long lived and  
43 provide faster and more vigorous immune responses upon secondary contact with their  
44 specific antigen<sup>3</sup>. Some memory cells circulate between blood, secondary lymphoid  
45 organs and bone marrow, while others migrate to peripheral tissues and mucosal sites  
46 where they can become tissue resident<sup>4</sup>.

47 Whereas subdivision of labor in terms of tissue homing and effector functions  
48 has been well characterized for memory T cells, functionally different subsets also exist  
49 in memory B cells (MBCs). Antigen-stimulated B cells receiving instructive signals  
50 from their interaction with CD4<sup>+</sup> T helper (Th) cells can further differentiate in germinal  
51 centers (GCs) of secondary lymphoid organs or via an extrafollicular pathway. In the  
52 GC, this differentiation includes affinity maturation through somatic hypermutation  
53 (SHM) of the B cell receptor (BCR), following which B cells can become long-lived  
54 plasma cells or MBCs<sup>5-7</sup>. Most long-lived plasma cells home to bone marrow niches  
55 where they are able to continuously secrete high-affinity antibodies protective against  
56 a homologous pathogen<sup>8,9</sup>, whereas resting GC-derived MBCs encode a broader  
57 repertoire and are subsequently able to provide protection against variants of the initial  
58 pathogen<sup>10,11</sup>. Upon reencounter with their cognate antigen, MBCs differentiate into  
59 antibody-secreting plasma cells or reenter GCs where they undergo additional  
60 SHM<sup>12,13</sup>.

61 MBCs can be subdivided into phenotypically and functionally distinct subsets<sup>14</sup>.  
62 In humans, resting MBCs typically express high surface levels of CD21, also known as  
63 complement receptor 2, and express the tumor necrosis factor (TNF) receptor  
64 superfamily member CD27. Contrarily, absence of CD21 expression marks CD21<sup>-</sup>

65 CD27<sup>+</sup> activated and CD21<sup>-</sup>CD27<sup>-</sup> 'atypical' MBCs, both of which represent class-  
66 switched B cell subsets<sup>15-17</sup>. Unlike resting MBCs, the origin and differentiation path  
67 of activated and, particularly, atypical MBCs is less well defined. CD21<sup>-</sup>CD27<sup>+</sup> B cells  
68 are thought to represent a GC-derived population prone to plasma cell differentiation<sup>18</sup>.  
69 Conversely, CD21<sup>-</sup>CD27<sup>-</sup> atypical MBCs have been found in chronic infection,  
70 immunodeficiency, and autoimmune diseases where they are thought to be of  
71 extrafollicular origin<sup>19-25</sup>. CD21<sup>-</sup>CD27<sup>+</sup> activated and CD21<sup>-</sup>CD27<sup>-</sup> atypical antigen-  
72 specific MBCs have been detected transiently after different vaccines<sup>15,16,18,26,27</sup> and  
73 during infections with certain pathogens<sup>26,28-30</sup>, including acute severe acute respiratory  
74 syndrome coronavirus 2 (SARS-CoV-2)<sup>31-35</sup>. Atypical MBCs are characterized by  
75 expression of the transcription factor T-bet, which is essential for their development, as  
76 well as high abundance of CD11c and several inhibitory coreceptors, such as Fc  
77 receptor-like (FcRL) protein 5 (FcRL5)<sup>36-38</sup>. Atypical MBCs have been shown to be  
78 able to differentiate into antibody-secreting cells<sup>29,39</sup>. Thus, atypical MBCs could play  
79 a role in protective immune responses.

80 Here, we studied antigen-specific MBC subsets in human subjects at different  
81 time points after infection with SARS-CoV-2 and in individuals following SARS-CoV-  
82 2-specific vaccination. We found SARS-CoV-2 spike-binding (spike<sup>+</sup>) CD21<sup>-</sup>CD27<sup>+</sup>  
83 activated MBCs were the predominant subset in circulation during acute infection and  
84 upon vaccination, with substantial contribution of atypical MBCs, whereas at 6–12  
85 months after infection CD21<sup>+</sup> resting MBCs became prevalent. By using single-cell  
86 RNA sequencing (scRNA-seq), we discovered that single B cell clones were able to  
87 adopt different MBC subset fates and functional signatures upon antigen reexposure.

88

## 89 RESULTS

### 90 Longitudinal kinetics of SARS-CoV-2-specific MBC responses

91 To study antigen-specific MBC subsets in a human setting of natural infection and  
92 controlled immunization, we recruited a longitudinal cohort of coronavirus disease  
93 2019 (COVID-19) patients at acute infection and at six and 12 months after infection  
94 (referred to as memory phase) (Fig. 1a). Of the 65 patients, 42 had mild COVID-19 and  
95 23 severe COVID-19. Thirty-five patients received a SARS-CoV-2 mRNA vaccination  
96 between the six- and 12-month time point, and three subjects were vaccinated between  
97 acute infection and the six-month time point (Supp. Table 1). We developed a multimer  
98 staining based on biotinylated spike and receptor-binding domain (RBD) proteins of  
99 SARS-CoV-2 to analyze antigen-specific MBCs with a 28-color spectral flow  
100 cytometry panel (Fig. 1b, Supp. Fig. 1a). Analyzing the non-vaccinated samples, we  
101 observed a strong increase in frequencies of spike<sup>+</sup> and RBD<sup>+</sup> MBCs following SARS-  
102 CoV-2 infection, which remained stably high up to one year after infection (Fig. 1c–e).  
103 Frequencies of spike<sup>+</sup> MBCs were comparable in mild and severe COVID-19 patients  
104 (Fig. 1f).

105 We purified spike<sup>+</sup> versus spike<sup>-</sup> MBCs by fluorescence-activated cell sorting  
106 from blood of nine patients at the memory phases (Supp. Fig. 1b, Supp. Table 2),  
107 followed by droplet-based scRNA-seq combined with feature barcoding and BCR  
108 sequencing. MBCs specific for RBD, wild-type spike (spike<sub>WT</sub>) or the spike variants  
109 B.1.351 (beta) and B.1.617.2 (delta) were identified by streptavidin multimers carrying  
110 oligonucleotide barcodes. The vast majority of spike variant<sup>+</sup> and RBD<sup>+</sup> MBCs also  
111 recognized spike<sub>WT</sub> (Supp. Fig. 2a). Furthermore, we observed comparable frequencies  
112 of RBD-binding MBCs within spike<sup>+</sup> MBCs using our sequencing approach as with  
113 flow cytometry (Supp. Fig. 2b,c). When analyzing V heavy and light chain frequencies

114 of RBD<sup>+</sup> MBCs, we found several chains, including *IGHV3-30*, *IGHV3-53*, *IGHV3-66*,  
115 *IGKV1-5*, *IGKV1-9* and *IGKV1-33*, to be enriched compared to RBD<sup>-</sup> MBCs (Fig. 1g,  
116 Supp. Fig. 2d), which have been described to encode for RBD-binding antibodies<sup>40–42</sup>.

117 Moreover, we characterized immunoglobulin (Ig) isotypes and subtypes of  
118 spike<sup>+</sup> MBCs by flow cytometry. During acute infection spike<sup>+</sup> MBCs mainly  
119 expressed IgM and IgG, whereas IgG<sup>+</sup> MBCs predominated the memory phases, mostly  
120 of the IgG1 subtype, and around 5–10% expressed IgA (Fig. 1h,i). In summary, these  
121 data identify a durable, spike-specific, and IgG1-dominated MBC response upon  
122 SARS-CoV-2 infection.

123

#### 124 **Evolution of spike<sup>+</sup> MBC subsets in blood from acute to memory phases**

125 To further characterize the SARS-CoV-2-specific MBC response, we visualized spike<sup>+</sup>  
126 MBCs by uniform manifold approximation and projection (UMAP) plots and  
127 performed an unsupervised Phenograph clustering (Fig. 2a, Supp. Fig. 3a–c). The  
128 UMAP grouped MBCs into IgM<sup>+</sup>, IgG<sup>+</sup>, and IgA<sup>+</sup> cells (Fig. 2a). Also, it revealed a  
129 phenotypical shift from acute infection to the memory time points, which was driven  
130 by increasing CD21 expression, whereas T-bet, Blimp-1, CD11c, CD71, and FcRL5  
131 expression diminished (Fig. 2b, Supp. Fig. 3b,c). The unsupervised Phenograph  
132 analysis of spike<sup>+</sup> MBCs identified distinct clusters, such as the CD21<sup>-</sup>CD27<sup>-</sup> atypical  
133 (MC07) cluster, which was Tbet<sup>hi</sup>, CD11c<sup>+</sup> and FcRL5<sup>+</sup>, and the CD21<sup>-</sup>CD27<sup>+</sup>  
134 activated (MC03) cluster characterized by a high expression of CD71, Blimp-1 and Ki-  
135 67 (Supp. Fig. 3a–c).

136 These changes in CD21 and CD27 could be reproduced by manual gating at  
137 acute infection, six and 12 months thereafter (Fig. 2c). Spike<sup>+</sup> CD21<sup>-</sup>CD27<sup>+</sup> and, to a  
138 lesser extent, also CD21<sup>-</sup>CD27<sup>-</sup> B cells were predominant during the acute response to

139 SARS-CoV-2, but they were strongly reduced at six and 12 months after infection (Fig.  
140 2d). Conversely, at the memory phases, CD21<sup>+</sup>CD27<sup>+</sup> and CD21<sup>+</sup>CD27<sup>-</sup> made up most  
141 of the antigen-specific MBC compartment (Fig. 2d). These dynamics were similar in  
142 patients with mild and severe COVID-19, except that severe COVID-19 patients had  
143 slightly higher levels of spike<sup>+</sup> CD21<sup>-</sup>CD27<sup>-</sup> B cells at six months after infection (Supp.  
144 Fig. 3d).

145 The transcription factors Blimp-1 and T-bet as well as FcRL5 and the activation  
146 marker CD71 were increased on spike<sup>+</sup> B cells during acute infection and decreased at  
147 the memory phases (Fig. 2e). These changes were paralleled by strong proliferation of  
148 spike<sup>+</sup> B cells during the acute phase, as indicated by high Ki-67 expression (Fig. 2f).  
149 Intriguingly, spike<sup>+</sup> B cells continued to show lower but still significantly increased  
150 proliferation at six months after infection, which only returned to steady-state  
151 background levels at 12 months after infection (Fig. 2f).

152 Furthermore, we found a significantly increased SHM count in spike<sup>+</sup> MBCs at  
153 12 compared to six months in our scRNA-seq dataset (Fig. 2g). This difference was  
154 paralleled by an improved binding breadth measured by variant-binding capabilities of  
155 spike<sub>WT</sub><sup>+</sup> MBCs (Fig. 2h). On a transcriptional level, MBCs at six months had  
156 upregulated genes associated with B cell activation and GC emigration<sup>43</sup>, such as  
157 *NKFBIA*, *NFKBID*, *JUNB*, *MAP3K8* and *CD83*, compared to 12 months where *TLR10*  
158 and *IL2RG* were upregulated (Fig. 2i). Collectively, these data showed that SARS-  
159 CoV-2 infection induced a stable, resting CD21<sup>+</sup> MBC population in the circulation,  
160 which continuously matured after infection.

161

162

163 **Circulating versus tonsillar SARS-CoV-2-specific MBC subsets**

164 Having observed the dynamics of MBC subsets in blood, we wanted to assess the  
165 changes of SARS-CoV-2-specific B cells in a peripheral lymphoid organ. To this end,  
166 we obtained paired tonsil and blood samples of individuals only immunized with a  
167 SARS-CoV-2 mRNA vaccine but not infected with SARS-CoV-2 and of subjects that  
168 had recovered from SARS-CoV-2 infection and some of which were also vaccinated  
169 (Supp. Fig. 4a,b, Supp. Table 3). Using our multimer probe approach (Supp. Fig. 4a),  
170 we observed spike<sup>+</sup> MBCs in blood and tonsils of both vaccinated and recovered  
171 individuals, whereas nucleocapsid<sup>+</sup> MBCs were only enriched in blood and tonsils of  
172 subjects that had contact with the virus (Fig. 3a,b). Spike<sup>+</sup> tonsillar MBCs showed  
173 slightly lower percentages of IgG and IgM positivity, but IgA<sup>+</sup> cells were more frequent  
174 in tonsils than in circulation (Fig. 3c). Analyzing SARS-CoV-2-specific Bcl-6<sup>+</sup>Ki-67<sup>+</sup>  
175 GC B cells, we found a trend toward elevated levels of spike<sup>+</sup> and nucleocapsid<sup>+</sup> GC  
176 cells in subjects recovered from COVID-19 compared to individuals only vaccinated  
177 (Supp. Fig. 4c).

178 Assessing spike<sup>+</sup> MBC subsets, CD21<sup>-</sup>CD27<sup>+</sup> activated and CD21<sup>-</sup>CD27<sup>-</sup>  
179 atypical MBCs were found at higher frequencies in blood, whereas CD21<sup>+</sup> resting  
180 MBCs were more abundant in tonsils (Fig. 3d). Compared to their circulating  
181 counterparts, tonsillar spike<sup>+</sup> and nucleocapsid<sup>+</sup> MBCs expressed, on average, higher  
182 CD69, lower Ki-67, lower T-bet, and different chemokine receptor levels (Fig. 3e–g),  
183 suggestive of a resting and tissue-resident memory phenotype. Altogether, these data  
184 suggested that SARS-CoV-2 infection and mRNA vaccination led to the induction of  
185 long-lived and resting antigen-specific MBCs, which homed to peripheral secondary  
186 lymphoid organs where they acquired characteristics of tissue residency.

187



## 188 **Changes in MBC subsets following vaccination**

189 With the availability of SARS-CoV-2 mRNA vaccines, 35 individuals of our COVID-  
190 19 cohort got vaccinated between the six- and 12-month and three subjects before the  
191 six-month sampling time point (Fig. 1a, Supp. Table 1). This setting allowed us to  
192 investigate the MBC response to controlled antigen reexposure. Vaccination resulted in  
193 approximately five-fold increase in circulating MBC frequencies (Fig. 4a,b). As  
194 sampling occurred at different time points after vaccinations, time-resolved analysis of  
195 spike<sup>+</sup> MBCs revealed an early peak after vaccination followed by a slow decrease in  
196 frequencies (Fig. 4c). In our scRNA-seq dataset, we observed an increased clonality in  
197 paired samples after vaccination (Fig. 4d). Moreover, we found counts of SHM  
198 remained high in spike<sup>+</sup> MBCs even after vaccination compared to six-month samples  
199 (Fig. 4e).

200 Whereas spike<sup>+</sup> MBCs were predominantly of a resting CD21<sup>+</sup> memory  
201 phenotype at six months, SARS-CoV-2 mRNA vaccination very strongly induced the  
202 appearance of spike<sup>+</sup> CD21<sup>-</sup>CD27<sup>+</sup> activated and CD21<sup>-</sup>CD27<sup>-</sup> atypical MBCs in blood  
203 (Fig. 4f,g). Spike<sup>+</sup> CD21<sup>-</sup>CD27<sup>+</sup> activated MBCs sharply peaked after vaccination  
204 followed by a rapid decline thereafter. Conversely, frequencies of spike<sup>+</sup> CD21<sup>-</sup>CD27<sup>-</sup>  
205 atypical MBCs, which accounted for about 20% of spike<sup>+</sup> MBCs, remained stable after  
206 vaccination (Fig. 4h).

207

## 208 **Transcriptional makeup of SARS-CoV-2-specific MBC subsets**

209 To gain insight into pathways guiding development of different MBC subsets we  
210 focused on our scRNA-seq dataset of sorted spike<sup>+</sup> and spike<sup>-</sup> memory B cells (Supp.  
211 Fig. 5a). Based on weighted-nearest neighbor (WNN) clustering of all sequenced  
212 MBCs, we identified 10 clusters and subsequently merged these into five subsets based

213 on surface markers, determined by oligonucleotide-tagged antibodies, and isotype  
214 expression (Supp. Fig. 5b). We annotated these five subsets as CD21<sup>-</sup>CD27<sup>+</sup>CD71<sup>+</sup>  
215 activated, CD21<sup>-</sup>CD27<sup>-</sup>FcRL5<sup>+</sup> atypical, CD21<sup>+</sup>CD27<sup>-</sup> resting, CD21<sup>+</sup>CD27<sup>+</sup> resting,  
216 and unswitched MBCs (Fig. 5a, Supp. Fig. 5b). We subsequently focused on the spike<sup>+</sup>  
217 MBCs. Six and 12 months after acute SARS-CoV-2 infection the predominant subset  
218 in individuals not receiving vaccination consisted of CD21<sup>+</sup> resting MBCs, whereas  
219 activated and atypical MBCs made up the main subsets in subjects at 12 months after  
220 infection that had been vaccinated (Fig. 5a,b, Supp. Fig. 5d). As expected, unswitched  
221 MBCs were almost entirely IgM<sup>+</sup>, whereas the other MBC subsets expressed mainly  
222 IgG subclasses, with atypical MBCs containing the lowest fraction of IgM<sup>+</sup> cells (Supp.  
223 Fig. 5e). These findings were consistent with our flow cytometry analysis of Ig  
224 subclasses in spike<sup>+</sup> MBCs (Supp. Fig. 5f).

225 Analysis of significant differentially-expressed genes (DEGs) revealed marked  
226 differences in the spike<sup>+</sup> MBC subsets in terms of transcription factors, signaling,  
227 surface molecules, and antigen presentation (Fig. 5c). Atypical MBCs were the most  
228 distinctive subset, expressing the highest levels of *TBX21* (encoding T-bet), the T-bet-  
229 driven genes *ZEB2* and *ITGAX*, and *TOX*. Moreover, atypical MBCs were enriched in  
230 gene transcripts involved in interferon- $\gamma$  and BCR signaling and showed high  
231 expression of the integrins *ITGAX*, *ITGB2*, and *ITGB7*. Notably, expression of  
232 inhibitory receptors, including *FCRL2*, *FCRL3*, *FCRL5*, *SIGLEC6*, *SIGLEC10*, *LAIR1*,  
233 *LILRB1*, and *LILRB2*, was particularly high in atypical MBCs. Furthermore, atypical  
234 MBCs showed high expression of proteins involved in antigen presentation and  
235 processing, such as *HLA-DPA1*, *HLA-DPB1*, *HLA-DRB1*, *HLA-DRB5*, *CD74*, and  
236 *CD86*. Several of these differences were also confirmed on protein level (Fig. 5d).

237 To further investigate differentially regulated processes in the subsets we  
238 performed gene set variation and enrichment analysis, respectively (Fig. 5e-g). Using a  
239 previously described atypical B cell signature<sup>44</sup>, we found a strong enrichment of this  
240 signature in our respective SARS-CoV-2-specific MBC subset. In line with the DEGs,  
241 gene sets involved in antigen presentation and integrin-mediated signaling were  
242 prominently enriched in atypical MBCs compared to resting and activated MBCs (Fig.  
243 5e). Moreover, also B cell activation, BCR and interferon- $\gamma$  signaling was highly  
244 upregulated in atypical MBCs (Fig. 5e-g). All these transcriptional hallmarks of  
245 atypical MBCs were very differently expressed in the other MBC subsets (Fig. 5c-e).

246

#### 247 **Clonal relationships between antigen-specific MBC subsets**

248 Our setup allowed us to longitudinally track spike<sup>+</sup> MBC clones to investigate the  
249 relationship of the different MBC subsets and the factors guiding their fate decisions.  
250 Indeed, we observed some clonal overlap between spike<sup>+</sup> resting, activated, and  
251 atypical MBCs (Supp. Fig. 6a). Subsequently, we focused on the longitudinal aspect  
252 and identified 30 persistent clones between six and 12 months after SARS-CoV-2  
253 infection in individuals vaccinated during that period (Fig. 6a, Supp. Fig. 6b). In  
254 individuals at six months after acute infection and before vaccination, about 80% of  
255 persistent MBC clones were of a CD21<sup>+</sup> resting phenotype (Fig. 6b). Conversely, upon  
256 vaccination, about 33% of MBC clones showed an activated and another 30% an  
257 atypical phenotype, both in persistent and newly detected clones (Fig. 6b).

258 We could demonstrate by three different measures that cells of individual MBC  
259 clones were able adopt different MBC fates following vaccination at six to 12 months  
260 after infection. Firstly, we saw in single MBC clones upregulation of genes associated  
261 with the atypical B cell lineage, including *TBX21*, *ITGAX* and *FCRL5* (Fig. 6c).

262 Secondly, by reconstructing clonal lineage trees, we found that cells of individual MBC  
263 clones acquired different MBC fates (Fig. 6d). And thirdly, we obtained similar results  
264 when visualizing persistent MBC clones in a circos plot, showing that cells of a given  
265 MBC clone could adopt different MBC phenotypes (Fig. 6e).

266 Assessment of SHMs in the different spike<sup>+</sup> MBC subsets revealed that only  
267 unswitched and CD27<sup>-</sup> resting MBCs had low counts, whereas CD27<sup>+</sup> resting,  
268 activated, and atypical MBCs contained comparably high counts (Fig. 6f). To further  
269 investigate the connection of MBC subsets, we performed a pseudotime-based  
270 trajectory analysis using Monocle 3 with our scRNA-seq dataset (Supp. Fig. 6c–d).  
271 Visualizing the cell subsets from our previous analysis on the Monocle UMAP space,  
272 we identified two branches, which strongly separated activated and atypical MBCs and  
273 branched out from the resting MBCs (Fig. 6g, Supp. Fig. 6e). Altogether, these findings  
274 show that upon immunization in SARS-CoV-2 recovered individuals, antigen-specific  
275 MBCs acquired distinct clonal differentiation fates along different trajectories.

276

## 277 **DISCUSSION**

278 In this study, we demonstrated that individual MBC clones harbored the capacity to  
279 adopt multiple and functionally different fates in COVID-19 patients during  
280 immunological memory and SARS-CoV-2-specific immunization. Thus, single MBC  
281 clones were able to differentiate in vivo into CD21<sup>-</sup>CD27<sup>+</sup> activated, CD21<sup>-</sup>CD27<sup>-</sup>  
282 atypical, or CD21<sup>+</sup>CD27<sup>+/-</sup> resting MBCs upon vaccination. Whereas activated MBCs  
283 peaked and declined rapidly after vaccination, atypical MBCs remained stable and  
284 resting MBC subsets even increased in percentages. Moreover, we found an enrichment  
285 of SARS-CoV-2-specific resting MBCs in peripheral lymphoid organs carrying  
286 features of tissue-resident cells. Overall, these data provide evidence that single MBC  
287 clones can give rise to diverse MBC trajectories with phenotypically and functionally  
288 different characteristics during recall, including atypical MBCs.

289 Atypical MBCs have been previously observed in chronic infections with  
290 *Plasmodium falciparum*, human immunodeficiency virus (HIV), and hepatitis C virus,  
291 in immunodeficiencies, as well as in autoimmune diseases<sup>21,22,25,26,45</sup>. Moreover, these  
292 cells share certain features of so-called age-associated B cells found in mice, which are  
293 also characterized by high expression of CD11c and T-bet and implicated in  
294 autoimmunity<sup>46,47</sup>. Recently, influenza-specific atypical MBCs have been described  
295 transiently during de novo, but not recall, influenza vaccine responses<sup>16</sup>, as well as  
296 during acute SARS-CoV-2 infection and vaccination<sup>27,31-35</sup>, the latter of which is in line  
297 with our findings. Intriguingly, we find that SARS-CoV-2-specific atypical MBCs are  
298 transcriptionally very similar to their counterparts in autoimmune disease. These results  
299 further confirm that atypical MBCs are part of the normal immune response against  
300 different pathogens<sup>48</sup>.

301 A defining feature of atypical MBCs appears to be increased BCR and  
302 interferon- $\gamma$  signaling, which likely induce and govern their T-bet-controlled program.  
303 In line with this suggestion, a recent study elegantly demonstrated that efficient T-bet  
304 expression in human B cells required strong BCR and interferon- $\gamma$  receptor stimulation  
305 along with signals from pathogen-associated molecular patterns or from Th cells<sup>38</sup>.  
306 Confirming and extending these data, we also found in SARS-CoV-2-specific atypical  
307 MBCs signs of increased BCR and interferon- $\gamma$  signaling, the latter of which fitted well  
308 with the increased levels of T-bet and the T-bet target genes *ZEB2* and *ITGAX*  
309 (encoding CD11c). Conversely, atypical B cells were completely absent in a patient  
310 with an inborn T-bet deficiency<sup>37</sup>, demonstrating the crucial role of T-bet also in human  
311 atypical B cells.

312 Several models have been proposed to explain the development of MBC  
313 heterogeneity<sup>49,50</sup>. Thus, MBC subsets could comprise entirely separate lineages with  
314 different BCR repertoires or single B cell clones could give rise to phenotypically and  
315 functionally different MBC subsets, with stably imprinted phenotype and function  
316 versus full or hierarchical plasticity. Our longitudinal data are in line with the latter  
317 model in showing that different MBC subsets were clonally related. Studies in humans  
318 with systemic lupus erythematosus or following HIV infection suggest that atypical  
319 MBCs differentiated via an extrafollicular pathway, thus avoiding GCs<sup>23,24</sup>. In our  
320 analysis, the SHM counts in different antigen-specific MBC subsets revealed that  
321 resting, activated, and atypical MBCs contained comparable levels SHMs. This could  
322 either reflect a GC origin of the subsets including atypical MBCs or that atypical MBCs  
323 originate from a GC-derived progenitor MBC upon antigen rechallenge. The latter  
324 hypothesis fits well with our clonal analysis. It remains to be investigated whether the  
325 atypical MBCs we observed following vaccination in the memory phase can again

326 become resting MBCs or whether their functional phenotype remains fated. The  
327 expression of *ZEB2* in atypical MBCs could suggest the latter, as *ZEB2* together with  
328 T-bet commits CD8<sup>+</sup> effector T cells to a terminal differentiation state and has been  
329 proposed to act similarly in B cells<sup>23,51</sup>.

330 Whether atypical MBCs contribute to protective immunity in acute and chronic  
331 infection in humans remains a field of controversy<sup>52</sup>. T-bet-expressing B cells,  
332 including atypical MBCs, played a protective role in mouse models of acute and chronic  
333 viral infections<sup>49,53</sup>. Moreover, intrinsic T-bet expression in B cells was essential for  
334 forming long-lived antibody-secreting B cells in a mouse model of influenza  
335 infection<sup>54</sup>. However, in the above-mentioned T-bet-deficient patient, antibody  
336 responses to several previously-applied vaccines, such as tetanus toxoid, diphtheria,  
337 *Haemophilus influenzae* type b, and pneumococcal antigen, were all normal<sup>37</sup>. Atypical  
338 MBCs in humans were thought to have a reduced capacity to develop into antibody-  
339 secreting cells due to their expression of inhibitory receptors, albeit recent studies  
340 showing they can secrete antibodies when receiving T cell help and act as antigen-  
341 presenting cells<sup>29,55</sup>. According to our results, spike<sup>+</sup> atypical MBCs carried signs of  
342 increased antigen processing and presentation, however, a recent study in atypical B  
343 cells isolated from patients with systemic autoimmune diseases failed to show an  
344 enhanced ability of these cells to stimulate Th cells in vitro compared to other B cell  
345 subsets<sup>56</sup>.

346 Our data showed that SARS-CoV-2 infection induced long-lived, stable  
347 antigen-specific MBCs in the circulation<sup>57,58</sup>. These cells acquired a CD21<sup>+</sup> resting  
348 memory phenotype in the memory phase and continued to mature up to one year after  
349 infection, as evidenced by their elevated proliferation rate, increasing SHM counts, and  
350 improved breadth of SARS-CoV-2 antigen recognition. This is in line with previous

351 publications showing that SARS-CoV-2 infection led to lasting MBC maturation via an  
352 ongoing GC reaction, potentially due to persistent antigen<sup>32,59,60</sup>. COVID-19 severity  
353 did not appear to significantly affect frequencies of SARS-CoV-2-specific MBCs,  
354 except for a tendency to more spike<sup>+</sup> MBCs in severe COVID-19, which is consistent  
355 with previous findings of increased spike-specific Ig in these patients<sup>61</sup>. These  
356 observations in circulating MBCs were paralleled by the appearance of resting MBCs  
357 we found in tonsils where they showed high expression of CD69, low proliferation  
358 rates, and low levels of T-bet. The phenotype, together with the chemokine receptor  
359 expression of the different subsets in the circulation is suggestive that these cells arise  
360 from the CD21<sup>+</sup> resting MBC subsets. Previous work found an enrichment of  
361 hemagglutinin-specific atypical MBCs in the human spleen<sup>49</sup>. Considering the  
362 chemokine receptor profile of atypical MBCs it is intriguing to speculate that the cells  
363 could migrate to tissue niches<sup>62</sup>. CD69 expression is a hallmark of tissue residency in  
364 T cells<sup>4,63</sup> and has also been proposed to characterize resident memory B cell  
365 populations in lymphoid and non-lymphoid human tissues<sup>64,65</sup>. A previous publication  
366 found SARS-CoV-2-specific CD69<sup>+</sup> MBCs in lungs and in lung- and gut-draining  
367 lymph nodes of COVID-19 recovered individuals<sup>66</sup>. Unfortunately, we were unable to  
368 receive other tissue samples other than tonsils to extend our findings.

369 Other potential shortcomings of our study include the limitation that our clonal  
370 analysis was restricted to the vaccination setting, as cell numbers during acute infection  
371 were too low for our sequencing approach. Moreover, although our multimer staining  
372 approach has been previously used<sup>57,58,67</sup> and we further confirmed the validity by  
373 identifying several previously described variable chains to be enriched in RBD<sup>+</sup>  
374 MBCs<sup>40-42</sup>, this approach might miss low-affinity antigen binders<sup>68</sup>.



375           Based on our data, we favor a linear-plastic model where stimulation and GC  
376 maturation of antigen-specific B cells results in MBCs that gradually adopt a CD21<sup>+</sup>  
377 Ki-67<sup>low</sup> bona fide resting state between 6-12 months after acute infection. These resting  
378 MBCs may circulate in the blood, thus providing a mobile unit of primed B cells able  
379 to rapidly respond to antigen rechallenge upon which they can acquire different MBC  
380 fates. Or they might home to secondary lymphoid and peripheral organs where they  
381 form a CD69<sup>+</sup> tissue-resident defense line, ready to deploy at potential entry sites of  
382 pathogens. Although they are currently unknown for MBCs, identification of the  
383 signals instructing resting MBCs to migrate to peripheral sites might guide  
384 immunization and booster strategies aimed at tissues and certain MBC subsets. On the  
385 latter, our work sheds further light on atypical MBCs, which appear to make up a  
386 sizeable portion of MBCs following an acute viral infection and vaccination in humans.

387

## 388 **METHODS**

### 389 **Flow cytometry cohort and scRNA-seq subcohort**

390 Following written informed consent COVID-19 patients were recruited at four hospitals  
391 in the Canton of Zurich, Switzerland. The study was approved by the Cantonal Ethical  
392 Committee of Zurich (BASEC #2016-01440). Patients had to have a reverse-  
393 transcriptase polymerase chain reaction (RT-PCR) confirmed SARS-CoV-2 infection  
394 and be symptomatic to be included in the study. Subsequently, patients visited again at  
395 six and at 12 months after infection and donated blood and serum samples at the  
396 respective time points, which was processed and biobanked. The full cohort and  
397 biobanking process has been previously described<sup>69,70</sup>. We included a total of 65  
398 patients, 42 with mild COVID-19 and 23 with severe COVID-19, from the full cohort  
399 (and 1 healthy control which was infected subsequently to establish the staining  
400 specificity) based on a power calculation from pre-experiments. Patients were selected  
401 according to the sample availability and had to have at least paired samples from 2 time  
402 points. The full flow cytometry cohort and scRNA-seq subcohort characteristics are  
403 shown in Supp. Table 1 and 2 respectively. The patients were included in the study  
404 during their acute disease between April 2020 and September 2020 and for the 12  
405 months follow-up between April 2021 and September 2021.

406

### 407 **Tonsil cohort**

408 Paired tonsil and peripheral blood samples, as well as serum samples, were collected  
409 from patients undergoing a tonsillectomy at the University Hospital Zurich between  
410 November 2021 and April 2022. All patients signed a written informed consent  
411 (BASEC #2016-01440) before sample collection. Patients underwent their  
412 tonsillectomy for recurrent and chronic tonsillitis or obstructive sleep apnea. Clinical

413 data regarding SARS-CoV-2 infection and vaccination was evaluated from history and  
414 derived from electronic medical records. From all the patients SARS-CoV-2 spike and  
415 nucleocapsid specific antibodies were measured (see below), patients were assigned as  
416 “SARS-CoV-2 recovered” if they had a confirmed SARS-CoV-2 infection and/or  
417 SARS-CoV-2 nucleocapsid antibodies. The cohort size was based on sample  
418 availability. The full cohort characteristics are shown in Supp. Table 3.

419         Peripheral blood and serum were processed and biobanked as described. Tonsils  
420 were processed according to established protocols<sup>66,71</sup>. Briefly, they were mechanically  
421 cut into smaller pieces, grinded through a 70 µm cell strainer, washed in phosphate  
422 buffered saline, before a density gradient centrifugation was performed. Subsequently,  
423 the mononuclear cells were washed, counted, frozen in fetal bovine serum with 10%  
424 dimethyl sulfoxide (DMSO) and stored in liquid nitrogen until use.

425

#### 426 **Spectral flow cytometry**

427 To stain antigen-specific B cells, we probe multimers were created, similarly, to  
428 previously described protocols<sup>58,67</sup>. Commercially available biotinylated SARS-CoV-2  
429 spike, RBD, nucleocapsid (MiltenyiBiotec) and H1N1 (A/California/07/2009,  
430 SinoBiological) were incubated separately with fluorescently labelled streptavidin  
431 (SAV) at 4:1 molar ratio for SARS-CoV-2 proteins and 6:1 for influenza antigen. SAV  
432 was added stepwise every 15 min at 4°C for 1hr. Subsequently, the staining mix was  
433 created by mixing the probes in 1:1 Brilliant Buffer (BD Bioscience) and FACS buffer  
434 (PBS with 2% FBS and 2mM EDTA) with 5µM of free D-biotin. For the tonsil cohort  
435 staining spike (separate multimers with SAV-BUV661 and BV421), RBD (SAV-  
436 KIRAVIA520), nucleocapsid (separate multimers with SAV-BUV737 and BV650),  
437 and hemagglutinin (SAV-BV785) and for the full cohort staining spike (separate

438 multimers with SAV-BV421 and SAV-BV650), RBD (SAV-PE/Cy7) and a decoy  
439 probe (SAV-BV785) were combined, termed “antigen-specific stain mix”.

440 Frozen mononuclear cells ( $\sim 5 \times 10^6$  cells) were thawed and plated in 96 U-  
441 bottom well plates. They were then stained with ZombieUV Live-Dead staining (1:400,  
442 Biolegend) and TruStain FcX (1:200, Biolegend) in PBS for 30 min, washed with  
443 FACS buffer and subsequently stained with 50  $\mu$ l of staining mix with the antigen-  
444 specific stain mix (200 ng spike, 50 ng RBD, 100 ng nucleocapsid, 20 ng SAV-Decoy  
445 per color per 50  $\mu$ l) for 1 hr at 4°C. After washing, the cells were then stained for 30  
446 min with the surface staining mix. The cells were then fixed and permeabilized with  
447 200  $\mu$ l transcription factor staining buffer (eBioscience) at room temperature for 1 hr.  
448 Lastly, cells were stained intracellularly with the intracellular staining mix in  
449 PermWash for 30 min at room temperature, before washing and resuspending in FACS  
450 buffer for acquisition (for full staining see Supp. Tables 4 and 6). The staining mixes  
451 were centrifuged at 14000 g for 2 min before staining. Subsequently, the samples were  
452 acquired on a Cytex Aurora spectral flow cytometer using the SpectroFlo software.  
453 Quality control for the cytometer was performed daily. The samples were analysed in  
454 several batches, paired samples were always recorded in the same batch. Furthermore,  
455 in every experiment the same positive control from a SARS-CoV-2 vaccinated healthy  
456 control was included to ensure consistent results.

457

#### 458 **SARS-CoV-2 antibody measurement**

459 For the full patient cohort, the anti-SARS-CoV-2 antibodies were measured by a  
460 commercially available enzyme-linked immunosorbent assay (ELISA) specific for the  
461 S1 protein of SARS-CoV-2 (Euroimmun SARS-CoV-2 IgG and IgA) as previously  
462 described<sup>61</sup>. In the tonsil cohort, the IgG, IgA and IgM response against SARS-CoV-2

463 RBD, S1, S2 and N was measured with a bead-based multiplexed immunoassay  
464 available at the Department of Medical Virology from the University of Zurich termed  
465 AntiBody CORonavirus Assay (ABCORA) which has previously been described<sup>72</sup>.

466

#### 467 **Cell Sorting for scRNA-seq**

468 To sort SARS-CoV-2 specific and non-specific memory B cells samples were  
469 processed similarly as for the spectral flow cytometry staining. Briefly, commercially  
470 available biotinylated SARS-CoV-2 spike (spike<sub>WT</sub>), RBD, spike variants beta and  
471 delta (MiltenyiBiotec) were multimerized as described with fluorescently labelled  
472 and/or barcoded streptavidin (TotalSeqC, Biolegend) (4:1 molar ratio). The total  
473 antigen-staining mix contained: spike<sub>WT</sub> separate multimers with SAV-BV421 and  
474 barcoded SAV-PE; RBD SAV-barcoded; spike beta variant barcoded SAV-PE, spike  
475 delta variant barcoded SAV-PE and separate decoy probe SAV-BV785 and SAV-  
476 barcoded. Frozen PBMCs were thawed, stained in a 96-U bottom well plate with fixable  
477 viability dye eFluor<sup>TM</sup>780 (eBioscience) and TruStainFcX for 20 min at 4°C, washed  
478 and then stained for 1hr with the antigen-specific stain mix. After washing, cells were  
479 stained for 30 min at 4°C with a surface staining mix which contained fluorescently  
480 labelled antibodies and a panel of barcoded antibodies (CD21, CD27, CD71, CXCR5,  
481 FcRL5; in the sample set where naïve B cells were sorted IgD), also each sample was  
482 stained with a hashtag antibody for sample multiplexing (for full panel see Supp. Table  
483 5). After 3 washing steps, the cells were resuspended and sorted on a FACS Aria III 4L  
484 sorter using a 70-µm nozzle. All specific cells per sample were sorted together with  
485 1500-2000 non-specific memory B cells. In one sample set we additionally sorted naïve  
486 B cells (500 per sample). Cells were sorted into the same tube.

487

488 **scRNA-seq sequencing and library preparation**

489 FACS-sorted B cells were analyzed by single cell RNA sequencing (scRNA-seq)  
490 utilizing the commercial 5' Single Cell GEX and VDJ v1.1 platform (10x Genomics).  
491 After sorting, cell suspensions were pelleted at 400 g for 10 min at 4°C, resuspended  
492 and loaded into the Chromium Chip following the manufacturer's instructions. 14  
493 cycles (in one case 17) of initial cDNA amplification were used for all sample batches  
494 and single-cell sequencing libraries for whole-transcriptome analysis (GEX), BCR  
495 profiling (VDJ), and TotalSeq (Biolegend) barcode detection (ADT) were generated.  
496 Final libraries were quantified using a Qubit Fluorometer, pooled in a ratio of 5:1:1 or  
497 10:1:1 (GEX:VDJ:ADT) and sequenced on a NovaSeq 6000 system.

498

499 **Flow Cytometry Analysis**

500 Flow cytometry data were analysed with FlowJo (version 10.8.0), full gating strategies  
501 are shown in Figures S1, S4. Subsets and markers of antigen-specific B cells were  
502 evaluated only in patients with >9 specific cells per sample and of antigen-specific  
503 subsets only if the subset had >3 specific cells. Dimensionality reduction and clustering  
504 analysis of flow cytometry data was performed using OMIQ ([www.omiq.ai](http://www.omiq.ai)). Markers  
505 were scaled with an arcsinh-transformation (cofactor 6000), the samples were subsetted  
506 to maximally 25 spike<sup>+</sup> MBCs per sample. For UMAP representations and PhenoGraph  
507 clustering, k was set to 20<sup>73</sup> and B cell markers of interest were used, including CD11c,  
508 CD19, CD20, CD21, CD24, CD27, CD38, CD71, CD80, CXCR5, BAFF-R, FcRL5,  
509 IgA, IgD, IgG, IgM, Blimp1, IRF8, Ki67, and Tbet.

510

511 **Single-cell transcriptome analysis**

512 Preprocessing of raw scRNA-seq data was done as described before<sup>69</sup>. Briefly, FASTQ  
513 files were aligned to the human GRCh38 genome using Cell Ranger's 'cellranger multi'  
514 pipeline (10x Genomics) (v6.1.2) with default settings, which allows to process  
515 together the paired GEX, ADT and VDJ libraries for each sample batch. Downstream  
516 analysis was conducted in R version 4.1.0 mainly with the package Seurat (v4.1.1)<sup>74</sup>.  
517 Cells with fewer than 200 or more than 2,500 detected genes and cells with more than  
518 10% detected mitochondrial genes were excluded from the analysis. Gene expression  
519 levels were log normalized using Seurat's `NormalizeData()` function with default  
520 settings. Sample assignment of cells was done using TotalSeq based cell hashing and  
521 Seurat's `HTODemux()` function. When comparing dataset quality, we noticed a  
522 markedly lower median gene detection and UMI count per cell in one of our datasets.  
523 We associated this with an incident during sample preparation in one of our experiments  
524 and decided to exclude most cells of this dataset from the analysis.

525 As an internal reference for SHM counts in naïve B cells, we co-sorted naïve B  
526 cells in one of our experiments. Before integration of this dataset with others and doing  
527 further downstream analysis, we excluded these cells from the dataset. For this, cells  
528 were clustered alone and naïve B cell clusters were identified based on their surface  
529 protein expression levels of CD27, CD21 and IgD as well as on their RNA levels of  
530 naïve B cell markers *TCLA1*, *IL4R*, *BACH2*, *IGHD* and *BTG1*. Independent datasets  
531 were then integrated using Seurat's anchoring-based integration method. Gene  
532 expression data and TotalSeq surface proteome data were first integrated separately.  
533 Then, Seurat's weighted nearest neighbor analysis was used to take advantage of our  
534 multimodal approach during clustering and visualization<sup>74</sup>. Clustering was performed  
535 using the Louvain algorithm and a resolution of 0.4. For UMAP generation, the  
536 embedding parameters were manually set to  $a=1.4$  and  $b=0.75$ . Differential gene

537 expression analyses were done using assay ‘RNA’ of the integrated dataset.  
538 FindAllMarkers and FindMarkers functions were executed with logfc.thresholds set to  
539 0.25 (0.1 when comparing RM cells at six months versus 12 months) and a min.pct  
540 cutoff at 0.1. Heatmaps were generated using the ComplexHeatmap package (v2.13.1)  
541 <sup>75</sup>.

542 Gene set enrichment analysis (gsea) was done as described before<sup>69</sup>. Briefly,  
543 lists of differentially expressed genes were first pre-ranked in decreasing order by the  
544 negative logarithm of their P value, multiplied for the sign of their average log-fold  
545 change (in R, ‘-log(P\_val)\*sign(avg\_log2FC)’). Gsea was then performed on this pre-  
546 ranked list using the R package fgsea (v.1.2). Gene sets were obtained from the  
547 Molecular Signatures Database (v7.5.1, collections H and C5) and loaded in R by the  
548 package msigdb (v.7.5.1). To make the results reproducible, the seed value was set  
549 (‘set.seed(42)’ in R) before execution. fgsea uses a P value estimation based on an  
550 adaptive multi-level split Monte-Carlo scheme. A multiple hypothesis correction  
551 procedure was applied to get adjusted P values. Finally, results were filtered for gene  
552 sets that were significantly enriched with adjusted  $P < 0.05$ .

553 Gene set variation analysis with the package gsva (v1.42.0) was used to estimate gene  
554 set enrichments for more than two groups<sup>76</sup>. Transcriptomes of individual cells were  
555 used as inputs for the gsva() function with default parameters. Then, gene set  
556 enrichments for individual cells were summarized to patient pseudo bulks by  
557 calculating the mean enrichment values of cells belonging to the same patient. Pseudo  
558 bulking was only done for patients with  $n > 20$  cells in each cell subset. The resulting  
559 scores were used to compute fold changes and significance levels for enrichment score  
560 comparisons between cell subsets in limma (v3.50.3)<sup>77</sup>.



561 Single cell trajectories were created with Monocle3 (version 1.2.9)<sup>78</sup>. First, raw  
562 counts obtained from the cellranger gene expression matrix were used to create cell  
563 data sets, which were then pre-processed using the Monocle 3 pipeline. Different  
564 batches were aligned using Batchelor (v.1.10.0)<sup>79</sup>. The num\_dim parameter of  
565 Monocle's preprocess\_cds() function was set to 20. Functions reduce\_dimension(),  
566 order\_cells() and graph\_test() were executed with default parameters.

567

### 568 **BCR analysis**

569 B cell clonality analysis was performed mainly with the changeo-10x pipeline from the  
570 Immcantation suite<sup>80</sup> using the singularity image provided by Immcantation developers.  
571 filtered\_contig\_annotations.csv files obtained from the cellranger multi pipeline were  
572 used as input for the changeo-10x pipeline. Unique combinations of bases were  
573 appended to the cell barcodes per batch before combining the data from different  
574 batches of sequencing to prevent cell barcode collisions. The clonality distance  
575 threshold was set to 0.20. Visualization of the clonal trees was done using dowser<sup>81</sup>.  
576 BCR variable gene segment usage was additionally quantified using the R package  
577 scRepertoire (v.1.3.5)<sup>82</sup>.

578

### 579 **Mapping of B Cell Receptor Sequences to Antigen Specificity**

580 We used an adaptation of LIBRaseq<sup>83</sup> to identify antigen specific cells in our  
581 sequencing data. First, the raw counts from the baiting negative control were subtracted  
582 from the counts of all other antigen-baiting constructs in every cell. Then, cutoffs for  
583 background binding levels were manually determined for every construct individually  
584 by inspection of the bimodal distribution of count frequencies across all cells. All  
585 binding counts falling below thresholds were set to zero and hence classified as “non-

586 binding”. Next, Seurat’s centered log ratio transformation was applied across features,  
587 followed by a scaling of the obtained values. This resulted in final LIBRA scores. Cells  
588 with LIBRA score  $> 0$  for any of the antigens used for baiting were defined as SARS-  
589 CoV-2-specific.

590

### 591 **Statistical Analysis**

592 The number of samples and subjects used in each experiment are indicated in the figure  
593 legends as are the statistical tests used. All tests were performed two-sided. In general,  
594 non-parametric Kruskal-Wallis tests were used to test for differences between  
595 continuous variables in more than 2 groups and p-values were adjusted for multiple  
596 testing using the Dunn’s method. Statistical analysis was performed with Graph-Pad  
597 Prism (Version 9.4.1, GraphPad Software, La Jolla California USA) and R (Version  
598 4.1.0). Statistical significance was established at  $P < 0.05$ .

599

## 600 **ACKNOWLEDGMENTS**

601 We thank the patients, Sara Hasler for assistance with patient recruitment, Laura Bürgi  
602 and Rebecca Masek for help with sample processing, the Departments of  
603 Otorhinolaryngology and Anesthesiology and the Transplantation Immunology  
604 Laboratory of University Hospital Zurich, Esther Baechli, Alain Rudiger, Melina  
605 Stüssi-Helbling, Lars C. Huber, the Functional Genomics Center Zurich, the Genomics  
606 Facility Basel, Stéphane Chevrier, and Daniel Pinschewer, Klaus Warnatz for helpful  
607 discussions and reading of the manuscript, and the members of the Boyman and Moor  
608 Laboratories for helpful discussions. Graphical representations were generated with  
609 BioRender.com.

## 610 **FUNDING**

611 This work was funded by the Swiss National Science Foundation (#4078P0-198431 to  
612 O.B. and J.N.; NRP 78 Implementation Programme to C.C. and O.B.; and #310030-  
613 200669 to O.B.), Clinical Research Priority Program CYTIMM-Z of University of  
614 Zurich (UZH) (to O.B.), Pandemic Fund of UZH (to O.B.), Innovation grant of USZ  
615 (to O.B.), Digitalization Initiative of the Zurich Higher Education Institutions Rapid-  
616 Action Call #2021.1\_RAC\_ID\_34 (to C.C.), Swiss Academy of Medical Sciences  
617 (SAMW) fellowships (#323530-191230 to Y.Z.; #323530-177975 to S.A.; #323530-  
618 191220 to C.C.), Young Talents in Clinical Research program of the SAMS and G. &  
619 J. Bangerter-Rhyner Foundation (YTCR 08/20; to M.E.R.), Filling the Gap Program of

620 UZH (to M.E.R.), BRCCH-EDCTP COVID-19 initiative (to A.E.M.), and the Botnar  
621 Research Centre for Child Health (COVID-19 FTC to A.E.M.).

## 622 **AUTHOR CONTRIBUTION**

623 Y.Z. designed and performed flow cytometry and scRNA-seq experiments, analyzed  
624 and interpreted data. J.M. designed and performed scRNA-seq experiments, analyzed  
625 and interpreted data. P.T. and S.A. contributed to flow cytometry experiments, patient  
626 recruitment and data collection. C.C. contributed to patient recruitment and data  
627 collection. M.E.R. and M.S. contributed to patient recruitment and clinical  
628 management. I.E.A. analyzed scRNA-seq data. J.N. contributed to patient recruitment.  
629 A.E.M. Designed experiments and interpreted data. O.B. conceived the project,  
630 designed experiments, and interpreted data. Y.Z. and O.B. wrote the manuscript with  
631 contribution by J.M. and A.E.M. All authors edited and approved the final manuscript.

## 632 **COMPETING INTERESTS**

633 The authors declare no competing financial interest related to this article.

634

## 635   **References**

- 636   1.    Gowans, J. L. & Uhr, J. W. The carriage of immunological memory by small  
637       lymphocytes in the rat. *Journal of Experimental Medicine* **124**, 1017–1030  
638       (1966).
- 639   2.    Sallusto, F., Lanzavecchia, A., Araki, K. & Ahmed, R. From Vaccines to  
640       Memory and Back. *Immunity* **33**, 451–463 (2010).
- 641   3.    Ahmed, R. & Gray, D. Immunological memory and protective immunity:  
642       understanding their relation. *Science* **272**, 54–60 (1996).
- 643   4.    Masopust, D. & Soerens, A. G. Tissue-Resident T Cells and Other Resident  
644       Leukocytes. *Annu Rev Immunol* **37**, 521–546 (2019).
- 645   5.    Victora, G. D. & Nussenzweig, M. C. Germinal Centers. *Annu Rev Immunol* **40**,  
646       413–442 (2022).
- 647   6.    Cyster, J. G. & Allen, C. D. C. B Cell Responses: Cell Interaction Dynamics and  
648       Decisions. *Cell* vol. 177 524–540 Preprint at  
649       <https://doi.org/10.1016/j.cell.2019.03.016> (2019).
- 650   7.    Elsner, R. A. & Shlomchik, M. J. Germinal Center and Extrafollicular B Cell  
651       Responses in Vaccination, Immunity, and Autoimmunity. *Immunity* vol. 53  
652       1136–1150 Preprint at <https://doi.org/10.1016/j.immuni.2020.11.006> (2020).
- 653   8.    Manz, R. A., Thiel, A. & Radbruch, A. Lifetime of plasma cells in the bone  
654       marrow. *Nature* **388**, 133–134 (1997).
- 655   9.    Bhattacharya, D. Instructing durable humoral immunity for COVID-19 and other  
656       vaccinable diseases. *Immunity* **55**, 945–964 (2022).
- 657   10.   Purtha, W. E., Tedder, T. F., Johnson, S., Bhattacharya, D. & Diamond, M. S.  
658       Memory B cells, but not long-lived plasma cells, possess antigen specificities for  
659       viral escape mutants. *Journal of Experimental Medicine* **208**, 2599–2606 (2011).

- 660 11. Akkaya, M., Kwak, K. & Pierce, S. K. B cell memory: building two walls of  
661 protection against pathogens. *Nature Reviews Immunology* 2019 20:4 **20**, 229–  
662 238 (2019).
- 663 12. Kurosaki, T., Kometani, K. & Ise, W. Memory B cells. *Nature Reviews*  
664 *Immunology* 2015 15:3 **15**, 149–159 (2015).
- 665 13. Tangye, S. G. & Tarlinton, D. M. Memory B cells: Effectors of long-lived  
666 immune responses. *Eur J Immunol* **39**, 2065–2075 (2009).
- 667 14. Weisel, F. & Shlomchik, M. Memory B Cells of Mice and Humans. *Annu Rev*  
668 *Immunol* **35**, 255–284 (2017).
- 669 15. Koutsakos, M. *et al.* Circulating TFH cells, serological memory, and tissue  
670 compartmentalization shape human influenza-specific B cell immunity. *Sci*  
671 *Transl Med* **10**, (2018).
- 672 16. Andrews, S. F. *et al.* Activation Dynamics and Immunoglobulin Evolution of  
673 Pre-existing and Newly Generated Human Memory B cell Responses to  
674 Influenza Hemagglutinin. *Immunity* **51**, 398-410.e5 (2019).
- 675 17. Ellebedy, A. H. *et al.* Defining antigen-specific plasmablast and memory B cell  
676 subsets in human blood after viral infection or vaccination. *Nat Immunol* **17**,  
677 1226–1234 (2016).
- 678 18. Lau, D. *et al.* Low CD21 expression defines a population of recent germinal  
679 center graduates primed for plasma cell differentiation. *Sci Immunol* **2**, (2017).
- 680 19. Warnatz, K. *et al.* Severe deficiency of switched memory B cells (CD27(+)IgM(-)  
681 )IgD(-)) in subgroups of patients with common variable immunodeficiency: a  
682 new approach to classify a heterogeneous disease. *Blood* **99**, 1544–1551 (2002).

- 683 20. Moir, S. *et al.* Evidence for HIV-associated B cell exhaustion in a dysfunctional  
684 memory B cell compartment in HIV-infected viremic individuals. *Journal of*  
685 *Experimental Medicine* **205**, 1797–1805 (2008).
- 686 21. Weiss, G. E. *et al.* Atypical memory B cells are greatly expanded in individuals  
687 living in a malaria-endemic area. *J Immunol* **183**, 2176–2182 (2009).
- 688 22. Chang, L. Y., Li, Y. & Kaplan, D. E. Hepatitis C viraemia reversibly maintains  
689 subset of antigen-specific T-bet<sup>+</sup> tissue-like memory B cells. *J Viral Hepat* **24**,  
690 389–396 (2017).
- 691 23. Jenks, S. A. *et al.* Distinct Effector B Cells Induced by Unregulated Toll-like  
692 Receptor 7 Contribute to Pathogenic Responses in Systemic Lupus  
693 Erythematosus. *Immunity* **49**, 725-739.e6 (2018).
- 694 24. Austin, J. W. *et al.* Overexpression of T-bet in HIV infection is associated with  
695 accumulation of B cells outside germinal centers and poor affinity maturation.  
696 *Sci Transl Med* **11**, (2019).
- 697 25. Freudenhammer, M., Voll, R. E., Binder, S. C., Keller, B. & Warnatz, K. Naive-  
698 and Memory-like CD21<sup>low</sup> B Cell Subsets Share Core Phenotypic and  
699 Signaling Characteristics in Systemic Autoimmune Disorders. *J Immunol* **205**,  
700 2016–2025 (2020).
- 701 26. Knox, J. J. *et al.* T-bet<sup>+</sup> B cells are induced by human viral infections and  
702 dominate the HIV gp140 response. *JCI Insight* **2**, (2017).
- 703 27. Zhang, Z. *et al.* Humoral and cellular immune memory to four COVID-19  
704 vaccines. *Cell* **185**, 2434-2451.e17 (2022).
- 705 28. Burton, A. R. *et al.* Circulating and intrahepatic antiviral B cells are defective in  
706 hepatitis B. *J Clin Invest* **128**, 4588–4603 (2018).

- 707 29. Hopp, C. S. *et al.* Atypical B cells up-regulate costimulatory molecules during  
708 malaria and secrete antibodies with T follicular helper cell support. *Sci.*  
709 *Immunol* vol. 7 <https://www.science.org> (2022).
- 710 30. Muellenbeck, M. F. *et al.* Atypical and classical memory B cells produce  
711 plasmodium falciparum neutralizing antibodies. *Journal of Experimental*  
712 *Medicine* **210**, 389–399 (2013).
- 713 31. Pape, K. A. *et al.* High-affinity memory B cells induced by SARS-CoV-2  
714 infection produce more plasmablasts and atypical memory B cells than those  
715 primed by mRNA vaccines. *CellReports* **37**, 109823 (2021).
- 716 32. Sokal, A. *et al.* Maturation and persistence of the anti-SARS-CoV-2 memory B  
717 cell response. *Cell* **184**, 1201-1213.e14 (2021).
- 718 33. Ogega, C. O. *et al.* Durable SARS-CoV-2 B cell immunity after mild or severe  
719 disease. *J Clin Invest* **131**, (2021).
- 720 34. Reyes, R. A. *et al.* SARS-CoV-2 spike-specific memory B cells express higher  
721 levels of T-bet and FcRL5 after non-severe COVID-19 as compared to severe  
722 disease. *PLoS One* **16**, e0261656 (2021).
- 723 35. Rodda, L. B. *et al.* Imprinted SARS-CoV-2-specific memory lymphocytes  
724 define hybrid immunity. *Cell* **185**, 1588-1601.e14 (2022).
- 725 36. Haga, C. L., Ehrhardt, G. R. A., Boohaker, R. J., Davis, R. S. & Cooper, M. D.  
726 Fc receptor-like 5 inhibits B cell activation via SHP-1 tyrosine phosphatase  
727 recruitment. *Proc Natl Acad Sci U S A* **104**, 9770–9775 (2007).
- 728 37. Yang, R. *et al.* Human T-bet governs the generation of a distinct subset of  
729 CD11chighCD21low B cells. *Sci Immunol* **7**, eabq3277 (2022).
- 730 38. Keller, B. *et al.* The expansion of human T-bet high CD21 low B cells is T cell  
731 dependent. *Sci Immunol* **6**, (2021).



- 732 39. Tipton, C. M. *et al.* Diversity, cellular origin and autoreactivity of antibody-  
733 secreting cell population expansions in acute systemic lupus erythematosus. *Nat*  
734 *Immunol* **16**, 755–765 (2015).
- 735 40. Robbiani, D. F. *et al.* Convergent antibody responses to SARS-CoV-2 in  
736 convalescent individuals. *Nature* *2020 584:7821* **584**, 437–442 (2020).
- 737 41. Tan, T. J. C. *et al.* Sequence signatures of two public antibody clonotypes that  
738 bind SARS-CoV-2 receptor binding domain. *Nature Communications* *2021 12:1*  
739 **12**, 1–10 (2021).
- 740 42. Qi, H., Liu, B., Wang, X. & Zhang, L. The humoral response and antibodies  
741 against SARS-CoV-2 infection. *Nature Immunology* *2022 23:7* **23**, 1008–1020  
742 (2022).
- 743 43. Dugan, H. L. *et al.* Profiling B cell immunodominance after SARS-CoV-2  
744 infection reveals antibody evolution to non-neutralizing viral targets. *Immunity*  
745 **54**, 1290-1303.e7 (2021).
- 746 44. Zumaquero, E. *et al.* IFN $\gamma$  induces epigenetic programming of human T-bethi B  
747 cells and promotes TLR7/8 and IL-21 induced differentiation. *Elife* **8**, (2019).
- 748 45. van Langelaar, J. *et al.* Induction of brain-infiltrating T-bet-expressing B cells  
749 in multiple sclerosis. *Ann Neurol* **86**, 264–278 (2019).
- 750 46. Hao, Y., O’Neill, P., Naradikian, M. S., Scholz, J. L. & Cancro, M. P. A B-cell  
751 subset uniquely responsive to innate stimuli accumulates in aged mice. *Blood*  
752 **118**, 1294–1304 (2011).
- 753 47. Rubtsov, A. v. *et al.* Toll-like receptor 7 (TLR7)-driven accumulation of a novel  
754 CD11c<sup>+</sup> B-cell population is important for the development of autoimmunity.  
755 *Blood* **118**, 1305–1315 (2011).

- 756 48. Sutton, H. J. *et al.* Atypical B cells are part of an alternative lineage of B cells  
757 that participates in responses to vaccination and infection in humans. *Cell Rep*  
758 **34**, (2021).
- 759 49. Johnson, J. L. *et al.* The Transcription Factor T-bet Resolves Memory B Cell  
760 Subsets with Distinct Tissue Distributions and Antibody Specificities in Mice  
761 and Humans. *Immunity* **52**, 842-855.e6 (2020).
- 762 50. Holla, P. *et al.* Shared transcriptional profiles of atypical B cells suggest common  
763 drivers of expansion and function in malaria, HIV, and autoimmunity. *Sci Adv*  
764 **7**, 8384–8410 (2021).
- 765 51. Dominguez, C. X. *et al.* The transcription factors ZEB2 and T-bet cooperate to  
766 program cytotoxic T cell terminal differentiation in response to LCMV viral  
767 infection. *J Exp Med* **212**, 2041–2056 (2015).
- 768 52. Naradikian, M. S., Hao, Y. & Cancro, M. P. Age-associated B cells: key  
769 mediators of both protective and autoreactive humoral responses. *Immunol Rev*  
770 **269**, 118–129 (2016).
- 771 53. Barnett, B. E. *et al.* Cutting Edge: B Cell–Intrinsic T-bet Expression Is Required  
772 To Control Chronic Viral Infection. *The Journal of Immunology* **197**, 1017–1022  
773 (2016).
- 774 54. Stone, S. L. *et al.* T-bet Transcription Factor Promotes Antibody-Secreting Cell  
775 Differentiation by Limiting the Inflammatory Effects of IFN- $\gamma$  on B Cells.  
776 *Immunity* **50**, 1172-1187.e7 (2019).
- 777 55. Portugal, S. *et al.* Malaria-associated atypical memory B cells exhibit markedly  
778 reduced B cell receptor signaling and effector function. *Elife* **4**, (2015).
- 779 56. Reincke, M. E. *et al.* The Antigen Presenting Potential of CD21<sup>low</sup> B Cells.  
780 *Front Immunol* **11**, 2664 (2020).

- 781 57. Cohen, K. W. *et al.* Longitudinal analysis shows durable and broad immune  
782 memory after SARS-CoV-2 infection with persisting antibody responses and  
783 memory B and T cells. *Cell Rep Med* **2**, 100354 (2021).
- 784 58. Dan, J. M. *et al.* Immunological memory to SARS-CoV-2 assessed for up to 8  
785 months after infection. *Science* **371**, (2021).
- 786 59. Gaebler, C. *et al.* Evolution of antibody immunity to SARS-CoV-2. *Nature* **2021**  
787 *591:7851* **591**, 639–644 (2021).
- 788 60. Sakharkar, M. *et al.* Prolonged evolution of the human B cell response to SARS-  
789 CoV-2 infection. *Sci Immunol* **6**, (2021).
- 790 61. Cervia, C. *et al.* Systemic and mucosal antibody responses specific to SARS-  
791 CoV-2 during mild versus severe COVID-19. *Journal of Allergy and Clinical*  
792 *Immunology* **147**, 545-557.e9 (2021).
- 793 62. Song, W. *et al.* Development of Tbet- and CD11c-expressing B cells in a viral  
794 infection requires T follicular helper cells outside of germinal centers. *Immunity*  
795 **55**, 290-307.e5 (2022).
- 796 63. Szabo, P. A., Miron, M. & Farber, D. L. Location, location, location: Tissue  
797 resident memory T cells in mice and humans. *Sci Immunol* **4**, (2019).
- 798 64. Weisel, N. M. *et al.* Comprehensive analyses of B-cell compartments across the  
799 human body reveal novel subsets and a gut-resident memory phenotype. *Blood*  
800 **136**, 2774–2785 (2020).
- 801 65. Tan, H. X. *et al.* Lung-resident memory B cells established after pulmonary  
802 influenza infection display distinct transcriptional and phenotypic profiles. *Sci*  
803 *Immunol* **7**, (2022).
- 804 66. Poon, M. M. L. *et al.* SARS-CoV-2 infection generates tissue-localized  
805 immunological memory in humans. *Sci Immunol* **6**, 9105 (2021).

- 806 67. Goel, R. R. *et al.* Distinct antibody and memory B cell responses in SARSCoV-  
807 2 naïve and recovered individuals following mRNA vaccination. *Sci Immunol* **6**,  
808 1–19 (2021).
- 809 68. Viant, C. *et al.* Antibody Affinity Shapes the Choice between Memory and  
810 Germinal Center B Cell Fates. *Cell* **183**, 1298-1311.e11 (2020).
- 811 69. Adamo, S. *et al.* Signature of long-lived memory CD8+ T cells in acute SARS-  
812 CoV-2 infection. *Nature* *2021 602:7895* **602**, 148–155 (2021).
- 813 70. Cervia, C. *et al.* Immunoglobulin signature predicts risk of post-acute COVID-  
814 19 syndrome. *Nat Commun* **13**, 446 (2022).
- 815 71. Niessl, J. *et al.* Identification of resident memory CD8+ T cells with functional  
816 specificity for SARS-CoV-2 in unexposed oropharyngeal lymphoid tissue. *Sci*  
817 *Immunol* **6**, (2021).
- 818 72. Abela, I. A. *et al.* Multifactorial seroprofiling dissects the contribution of pre-  
819 existing human coronaviruses responses to SARS-CoV-2 immunity. *Nature*  
820 *Communications* *2021 12:1* **12**, 1–18 (2021).
- 821 73. Levine, J. H. *et al.* Data-Driven Phenotypic Dissection of AML Reveals  
822 Progenitor-like Cells that Correlate with Prognosis. *Cell* **162**, 184–197 (2015).
- 823 74. Hao, Y. *et al.* Integrated analysis of multimodal single-cell data. *Cell* **184**, 3573-  
824 3587.e29 (2021).
- 825 75. Gu, Z., Eils, R. & Schlesner, M. Complex heatmaps reveal patterns and  
826 correlations in multidimensional genomic data. *Bioinformatics* **32**, 2847–2849  
827 (2016).
- 828 76. Hänzelmann, S., Castelo, R. & Guinney, J. GSVA: Gene set variation analysis  
829 for microarray and RNA-Seq data. *BMC Bioinformatics* **14**, 1–15 (2013).

- 830 77. Ritchie, M. E. *et al.* limma powers differential expression analyses for RNA-  
831 sequencing and microarray studies. *Nucleic Acids Res* **43**, e47 (2015).
- 832 78. Cao, J. *et al.* The single-cell transcriptional landscape of mammalian  
833 organogenesis. *Nature* **566**, 496–502 (2019).
- 834 79. Haghverdi, L., Lun, A. T. L., Morgan, M. D. & Marioni, J. C. Batch effects in  
835 single-cell RNA-sequencing data are corrected by matching mutual nearest  
836 neighbors. *Nat Biotechnol* **36**, 421–427 (2018).
- 837 80. Gupta, N. T. *et al.* Change-O: a toolkit for analyzing large-scale B cell  
838 immunoglobulin repertoire sequencing data. *Bioinformatics* **31**, 3356–3358  
839 (2015).
- 840 81. Hoehn, K. B., Pybus, O. G. & Kleinstei, S. H. Phylogenetic analysis of  
841 migration, differentiation, and class switching in B cells. *PLoS Comput Biol* **18**,  
842 (2022).
- 843 82. Borcherdig, N., Bormann, N. L. & Kraus, G. scRepertoire: An R-based toolkit  
844 for single-cell immune receptor analysis. *F1000Res* **9**, (2020).
- 845 83. Setliff, I. *et al.* High-Throughput Mapping of B Cell Receptor Sequences to  
846 Antigen Specificity. *Cell* **179**, 1636-1646.e15 (2019).

847

848

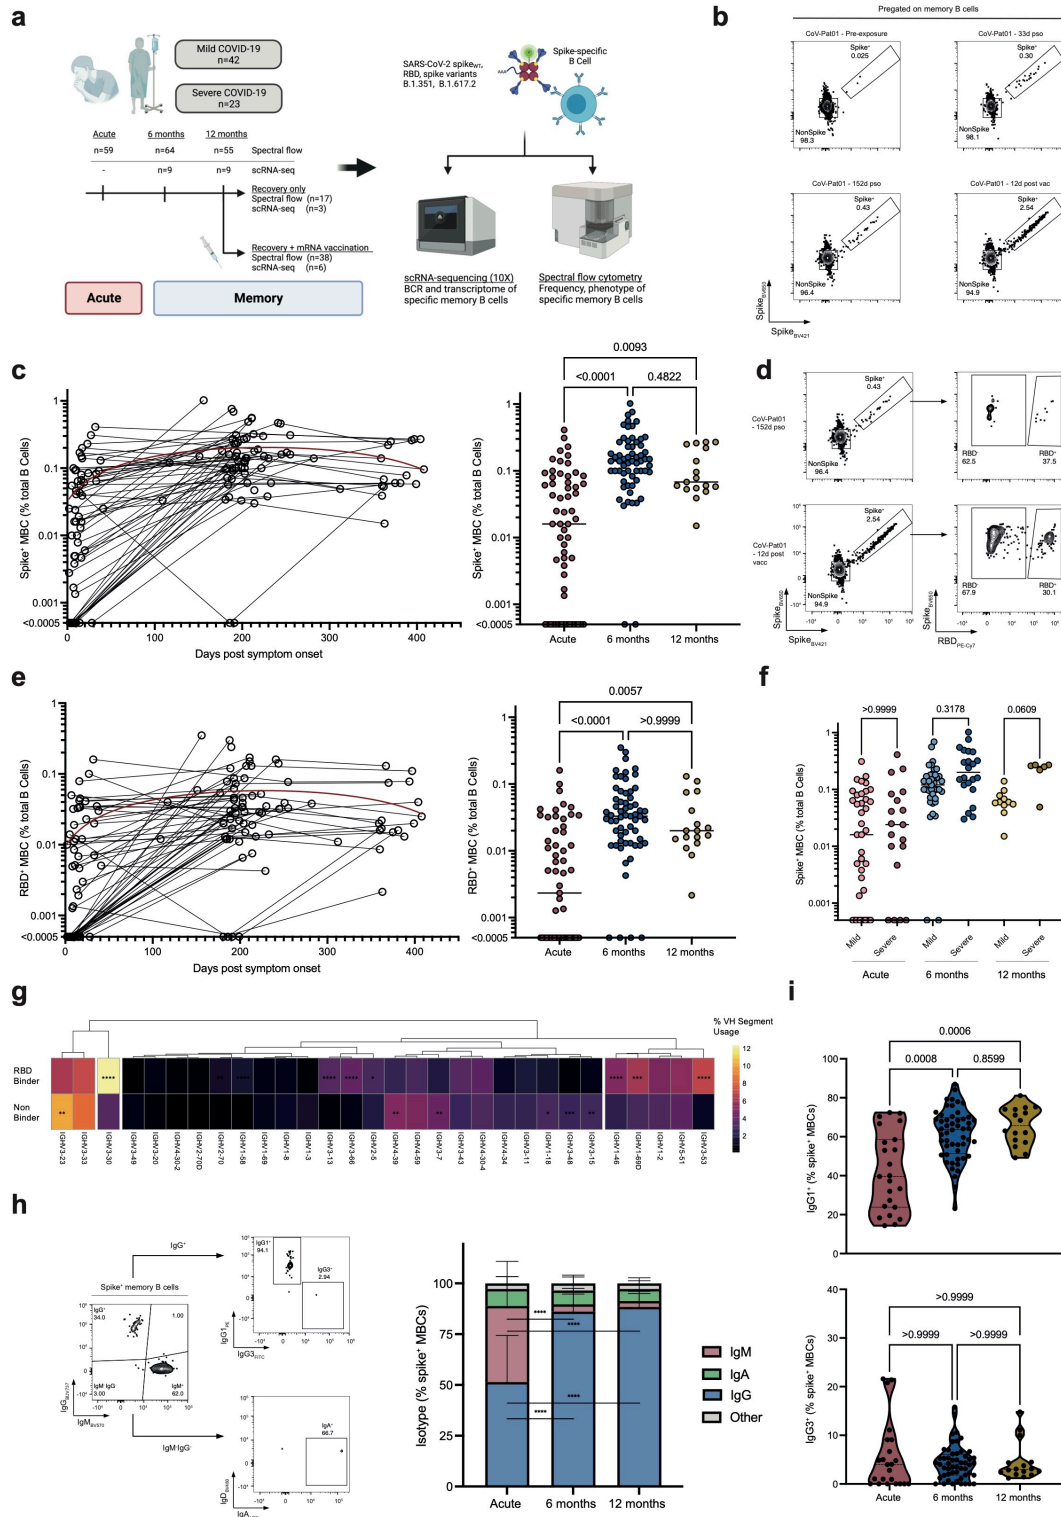

849

850 **Fig. 1. Longitudinal analysis of kinetics and magnitude of antigen-specific memory**  
 851 **B cells upon SARS-CoV-2 infection.**

852 **a**, Overview of study design and cohort. **b**, Representative flow cytometry plots of spike  
 853 multimer-stained memory B cells (MBCs; gating strategy shown in Supp. Fig. 1a) of

854 the same individual (CoV-Pat01) shown before SARS-CoV-2 infection (top left), at 33  
855 d (top right) and 152 d (bottom left) post symptom onset (ps), and at 12 d after  
856 vaccination (bottom right). Numbers indicate percentages of parent population. **c**,  
857 Frequency of spike<sup>+</sup> MBCs at indicated time points ps (left). Paired samples are  
858 connected with lines. Second-order polynomial function (red line,  $R^2=0.1932$ ) is fitted  
859 to the data. Dot plots and medians (right) of frequencies of spike<sup>+</sup> B cells at acute  
860 infection (n=59) and six (n=61) and 12 months (n=17) after infection. Samples  
861 collected after vaccination were excluded from this analysis. **d**, Representative flow  
862 cytometry plots showing gating strategy for RBD<sup>+</sup> and spike<sup>+</sup> MBCs of the same  
863 individual as in **b**. Numbers indicate percentages of parent population. **e**, Frequency of  
864 RBD<sup>+</sup> MBCs at indicated time points ps (left). Paired samples are connected with  
865 lines. Second-order polynomial function (red line,  $R^2=0.1298$ ) is fitted to the data. Dot  
866 plots and medians (right) of frequencies of RBD<sup>+</sup> B cells at acute infection (n=59) and  
867 six (n=61) and 12 months (n=17) after infection. **f**, Frequency of spike<sup>+</sup> B cells at acute  
868 infection and six and 12 months after infection, separated by disease severity,  
869 comparing mild (acute n=40, six months n=39, 12 months n=11) and severe COVID-  
870 19 (acute n=19, six months n=22, 12 months n=6). **g**, Heatmap comparing V heavy  
871 (VH) gene usage between RBD binders and non-binders. VH are sorted by hierarchical  
872 clustering, with colors indicating frequencies. The 30 most frequently used segments in  
873 RBD binders are shown. **h**, Representative gating strategy of indicated isotypes in  
874 spike<sup>+</sup> MBCs of a patient at acute infection (left). Stacked bar plot and mean + SD  
875 (right) showing isotype of spike<sup>+</sup> MBCs at acute infection (n=23) and six (n=52) and  
876 12 months (n=16) after infection. For all phenotypical analysis shown, samples were  
877 included if >9 spike<sup>+</sup> MBCs were available. **i**, Violin plots of percentages of IgG1<sup>+</sup> (top)

878 and IgG3<sup>+</sup> (bottom) spike<sup>+</sup> MBCs at acute infection (n=23) and six (n=52) and 12  
879 months (n=16) after infection.

880 Samples were compared using a Kruskal-Wallis test with Dunn's multiple comparison  
881 (**c, e, f, h, i**). Adjusted p-values are shown. In **g** frequencies were compared using two-  
882 proportions z-test with Bonferroni-based multiple testing correction. In **g** and **h** p-  
883 values are shown if significant (p<0.05). \*p<0.05, \*\*p<0.01, \*\*\*p<0.001, \*\*\*\*  
884 p<0.0001.

885



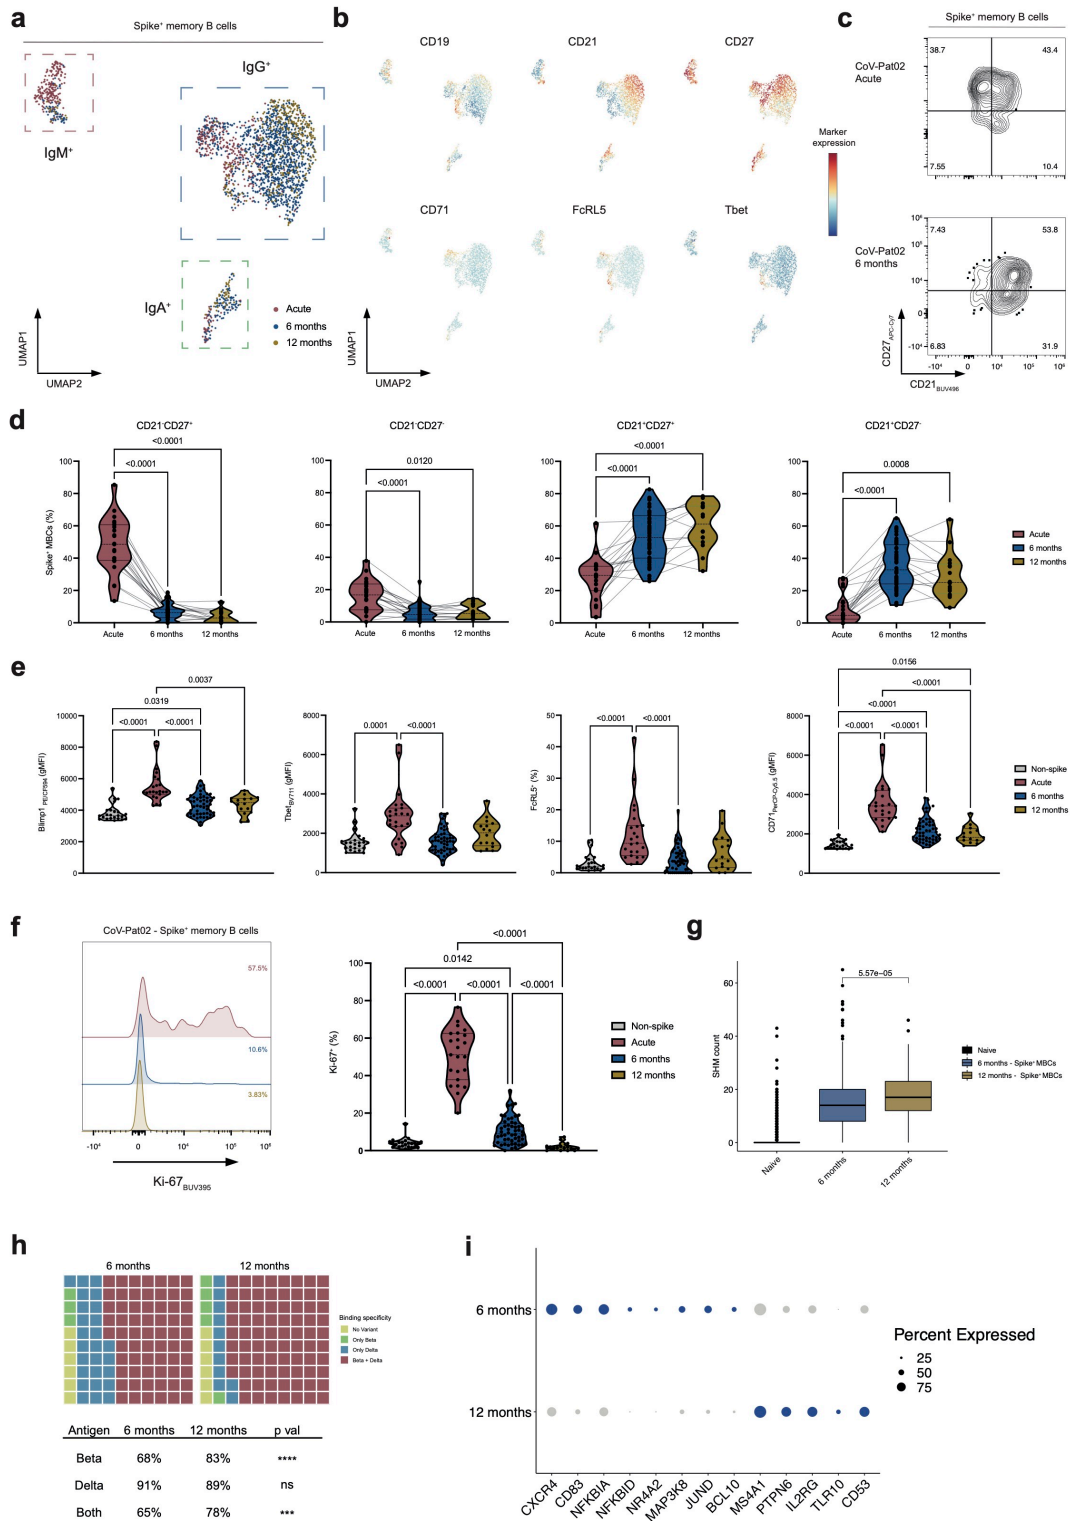

886

887 **Fig. 2. Phenotypic and functional characterization of circulating SARS-CoV-2-**

888 **specific MBCs at acute and memory time points.**

889 **a**, Uniform manifold approximation and projection (UMAP) plots of spike<sup>+</sup> MBCs

890 (n=120, excluding samples after vaccination), subsampled to maximally 25 cells per

891 sample and colored by time point. Islands of IgM<sup>+</sup>, IgA<sup>+</sup> and IgG<sup>+</sup> MBCs are indicated.  
892 **b**, As in **a** colored by indicated marker expression. **c**, Flow cytometry plots of spike<sup>+</sup>  
893 MBCs during acute infection and six months after infection of the same patient (CoV-  
894 Pat02). **d**, Violin plots of frequencies of indicated subsets of spike<sup>+</sup> MBCs at acute  
895 infection (n=23) and six (n=52) and 12 months (n=16) after infection. Paired samples  
896 are connected with lines. **e**, Violin plots of geometric mean fluorescence intensities  
897 (gMFI) or percentages of indicated markers in spike<sup>+</sup> MBCs at acute infection (n=23)  
898 and six (n=52) and 12 months (n=16) after infection, compared to spike<sup>-</sup> MBCs at acute  
899 infection (n=23). **f**, Representative histograms of Ki-67 in CoV-Pat02 (left) and violin  
900 plots of percentages of Ki-67<sup>+</sup> spike<sup>+</sup> MBCs (right) at indicated time points and  
901 compared to spike<sup>-</sup> MBCs. **g**, Somatic hypermutation (SHM) counts of all samples  
902 (excluding those after vaccination), comparing SHM counts in spike<sup>+</sup> MBCs that bound  
903 to any spike construct including wild-type (WT), variant, and RBD, at six (n=9) and 12  
904 months (n=3) after infection, with naïve B cells serving as reference. **h**, Waffle plot of  
905 spikew<sub>T</sub><sup>+</sup> MBCs binding beta (B.1.351) and delta spike variant (B.1.617.2) in  
906 unvaccinated individuals (n=9 at six and n=3 at 12 months). **i**, Expression (blue  
907 indicates upregulated genes) and percentages of selected, differently expressed genes  
908 in spike<sup>+</sup> MBCs between six and 12 months. Dot size indicates frequency of positive  
909 cells.

910 Samples in **d–f** were compared using a Kruskal-Wallis test with Dunn’s multiple  
911 comparison correction. Adjusted p-values are shown if significant (p<0.05). In **g**, two-  
912 sided Wilcoxon test was used with Holm multiple comparison correction. The box plots  
913 show median; box limits, interquartile range (IQR); whiskers, 1.5xIQR and outliers. In  
914 **h**, samples were compared using two-proportions z-test and, in **i**, using Wilcoxon Rank  
915 Sum test with Bonferroni correction. In **i**, all genes had adj. p<0.05 for differential

916 expression between the two groups. ns  $p > 0.05$ , \* $p < 0.05$ , \*\* $p < 0.01$ , \*\*\* $p < 0.001$ , \*\*\*\*

917  $p < 0.0001$ .

918

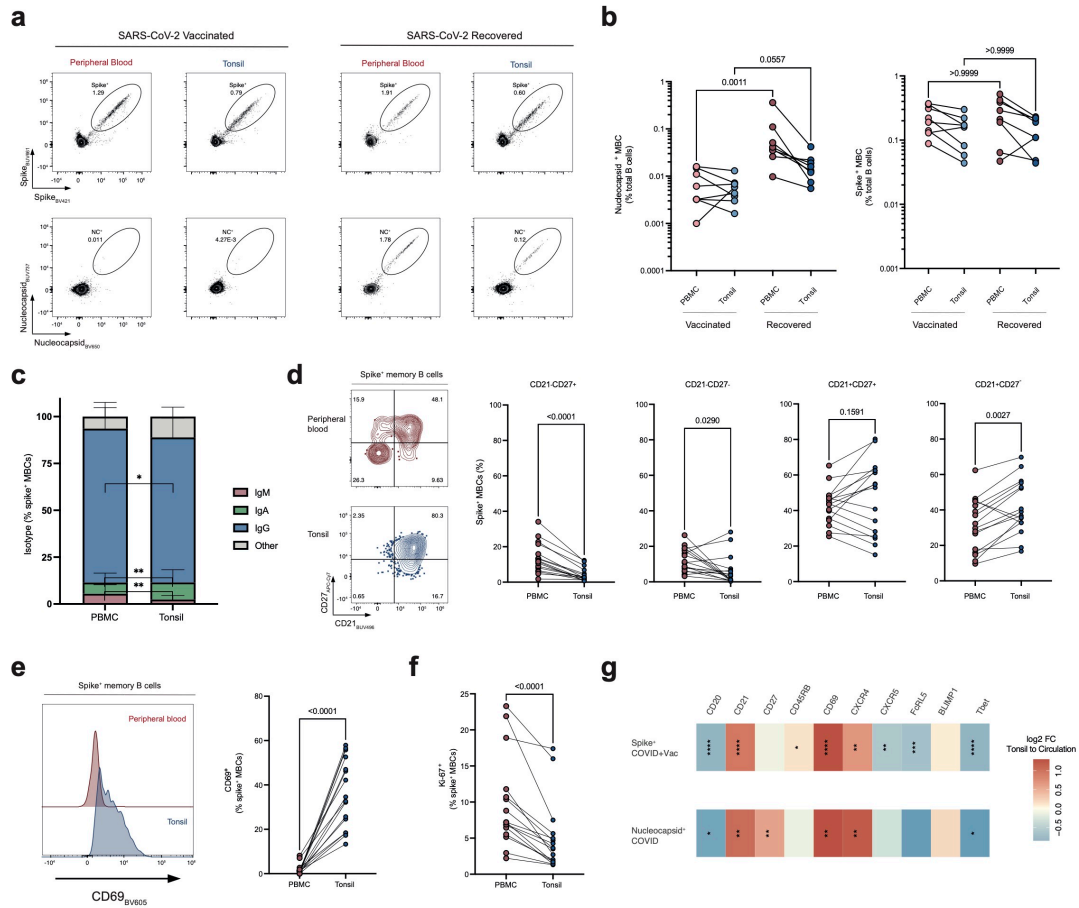

919

920 **Fig. 3. Phenotypes of circulating and tonsillar SARS-CoV-2-specific MBCs upon**  
 921 **infection and vaccination.**

922 **a**, Representative plots MBCs, showing spike<sup>+</sup> (top) and nucleocapsid<sup>+</sup> (bottom) cells  
 923 in a vaccinated (CoV-Tissue-01; left) and COVID-19-recovered (CoV-Tissue-02;  
 924 right) individual in paired tonsil and peripheral blood samples. **b**, Nucleocapsid<sup>+</sup> (left)  
 925 and spike<sup>+</sup> (right) MBC frequencies in peripheral blood and paired tonsil samples. Lines  
 926 connect paired samples. Groups are separated by SARS-CoV-2 vaccination (n=8) and  
 927 recovered status (n=8). Frequencies in same compartment between different groups  
 928 were compared. **c**, Stacked histograms showing isotype distribution in spike<sup>+</sup> MBCs in  
 929 peripheral blood and paired tonsils, mean + SD. Samples from vaccinated and COVID-  
 930 19-recovered individuals were combined for analysis (n=16). **d**, Contour plots of spike<sup>+</sup>  
 931 MBCs of peripheral blood (red, top left) and tonsil (blue, bottom left) of patient CoV-

932 Tissue-02. Frequencies of indicated subsets within spike<sup>+</sup> MBCs in peripheral blood  
933 and paired tonsils (right). Lines indicate paired samples. Samples from vaccinated and  
934 COVID-19-recovered individuals were combined for analysis (n=16). **e**, Representative  
935 histograms of CD69 (CoV-Tissue-02, left) and percentages of CD69<sup>+</sup> spike<sup>+</sup> MBCs in  
936 peripheral blood and tonsils (right). **f**, Percentages of Ki-67<sup>+</sup> spike<sup>+</sup> MBCs in peripheral  
937 blood and tonsils. **g**, Heatmap of log<sub>2</sub>-fold change of indicated markers in peripheral  
938 blood and tonsils, with red indicating higher expression in tonsils and blue in peripheral  
939 blood, in spike<sup>+</sup> MBCs (top) of vaccinated and COVID-19-recovered individuals  
940 (n=16) and in nucleocapsid<sup>+</sup> MBCs (bottom) of COVID-19-recovered individuals  
941 (n=8).

942 Unpaired samples were compared with Mann-Whitney test, paired tests with Wilcoxon  
943 matched-pairs signed rank test. In case of more than two groups, unpaired testing was  
944 performed using Kruskal-Wallis test with Dunn's multiple comparison correction. In **b**  
945 and **d**, all p-values are shown, in other plots p-values are shown if significant (p<0.05).  
946 \*p<0.05, \*\*p<0.01, \*\*\*p<0.001, \*\*\*\* p<0.0001  
947

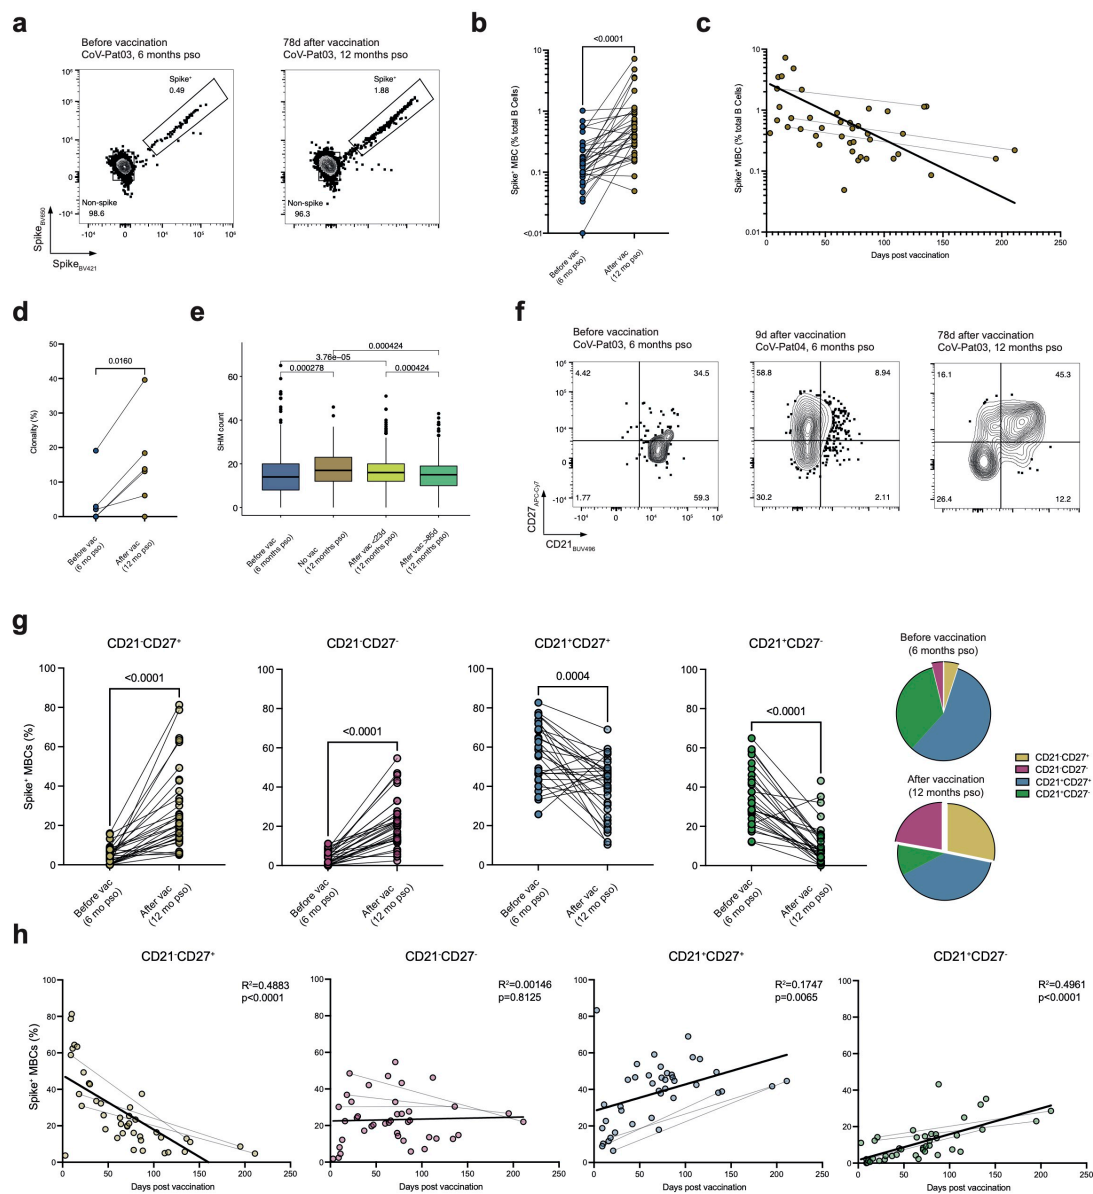

948

949 **Fig. 4. Changes in antigen-specific MBC subsets following vaccination.**

950 **a**, Representative flow cytometry plots of spike<sup>+</sup> MBCs before (left; six months after  
 951 acute infection) and 78 d after (right; 12 months after infection) vaccination (vac) in the  
 952 same patient (CoV-Pat03). **b**, Paired comparison of spike<sup>+</sup> MBC frequencies (n=34)  
 953 before (six months after infection) and after vaccination. **c**, Spike<sup>+</sup> MBC frequencies  
 954 (n=41) plotted as time after last vaccination, with lines connecting paired samples.  
 955 Semilog line fitted to data (R<sup>2</sup>=0.2695). **d**, Clonality analysis of spike<sup>+</sup> MBCs before  
 956 (six months after infection) and after vaccination. Each dot represents one individual

957 (n=6). **e**, SHM counts of spike<sup>+</sup> MBCs before (n=9; six months), without (n=3; 12  
958 months), as well as early (n=3; less than 23 d) and late (n=3; more than 85 d) after  
959 vaccination. **f**, Representative flow cytometry plots of CD21 and CD27 on spike<sup>+</sup>  
960 MBCs before and early and late after vaccination. **g**, Frequencies of spike<sup>+</sup> MBC  
961 subsets (n=29) and pie chart distribution (far right) of indicated MBC subsets at  
962 indicated time points. **h**, Percentages of spike<sup>+</sup> MBC subsets plotted as time after last  
963 vaccination. Lines combine paired samples. Linear regressions are fitted to data.  
964 Paired samples were compared with a Wilcoxon matched-pairs signed rank test (**b**, **g**)  
965 or paired t-test (**d**). In **e**, two-sided Wilcoxon test was used. Holm-Bonferroni method  
966 was used for p-value adjustment of multiple comparisons.  
967

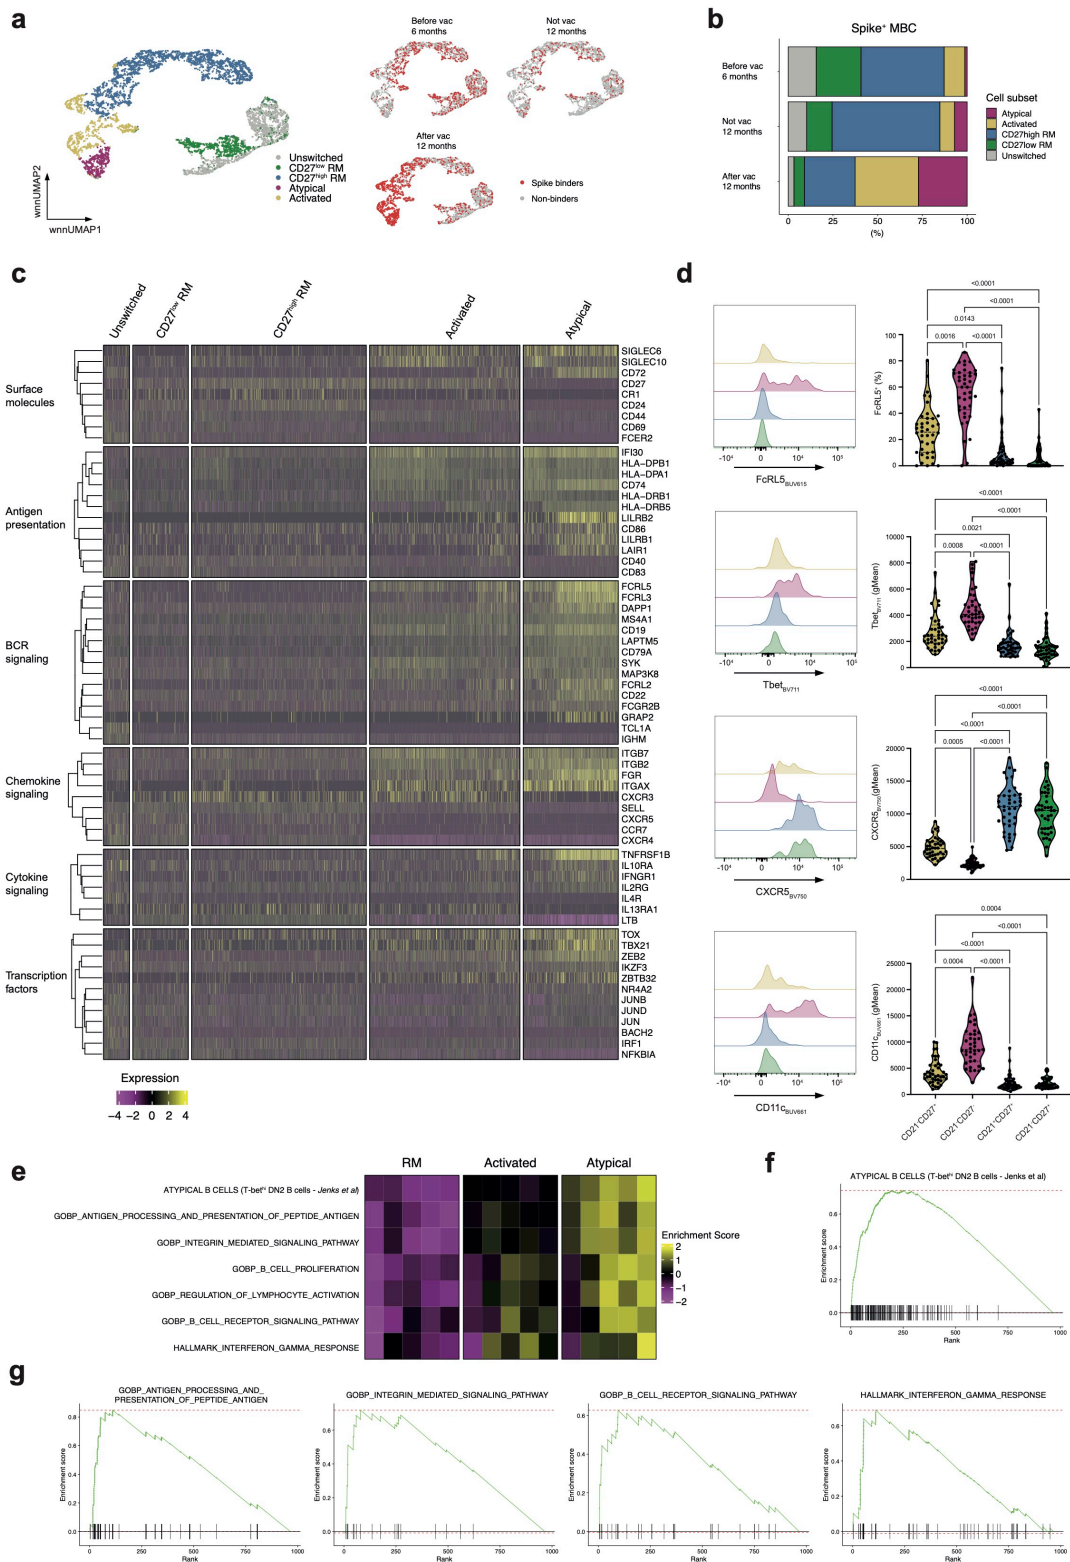

968

969 **Fig. 5. Transcriptional makeup of SARS-CoV-2-specific MBC subsets.**

970 **a**, Weighted-nearest neighbor UMAP (wnnUMAP) analysis of indicated MBC subsets  
 971 (n=9; left) and of MBCs binding or not binding to spike (right) at six months and 12  
 972 months after infection without vaccination, and at 12 months after infection and with



973 vaccination. **b**, Distribution of spike<sup>+</sup> MBC subsets at indicated time points. **c**, Heatmap  
974 of selected, significantly differentially expressed genes in MBC subsets. Functional  
975 groups of genes, ordered by hierarchical clustering. **d**, Representative histograms (left)  
976 and violin plots of indicated markers on spike<sup>+</sup> MBC subsets (right; n=41) after  
977 vaccination. Markers were compared if a subset had more than 3 cells. **e**, Heatmap of  
978 enrichment scores of selected gene sets, comparing CD21<sup>+</sup> resting memory (RM),  
979 activated, and atypical spike<sup>+</sup> MBCs in a pseudo bulk analysis (n=5 individuals, patients  
980 with more than 20 cells in each MBC subset). **f–g**, Gene set enrichment analysis of  
981 atypical versus RM spike<sup>+</sup> MBCs for selected gene sets. Red dashed lines indicate  
982 minimal and maximal cumulative enrichment values.

983 Samples in **d** were compared using Kruskal-Wallis test with Dunn's multiple  
984 comparison correction. Adjusted p-values are shown if significant (p<0.05).

985

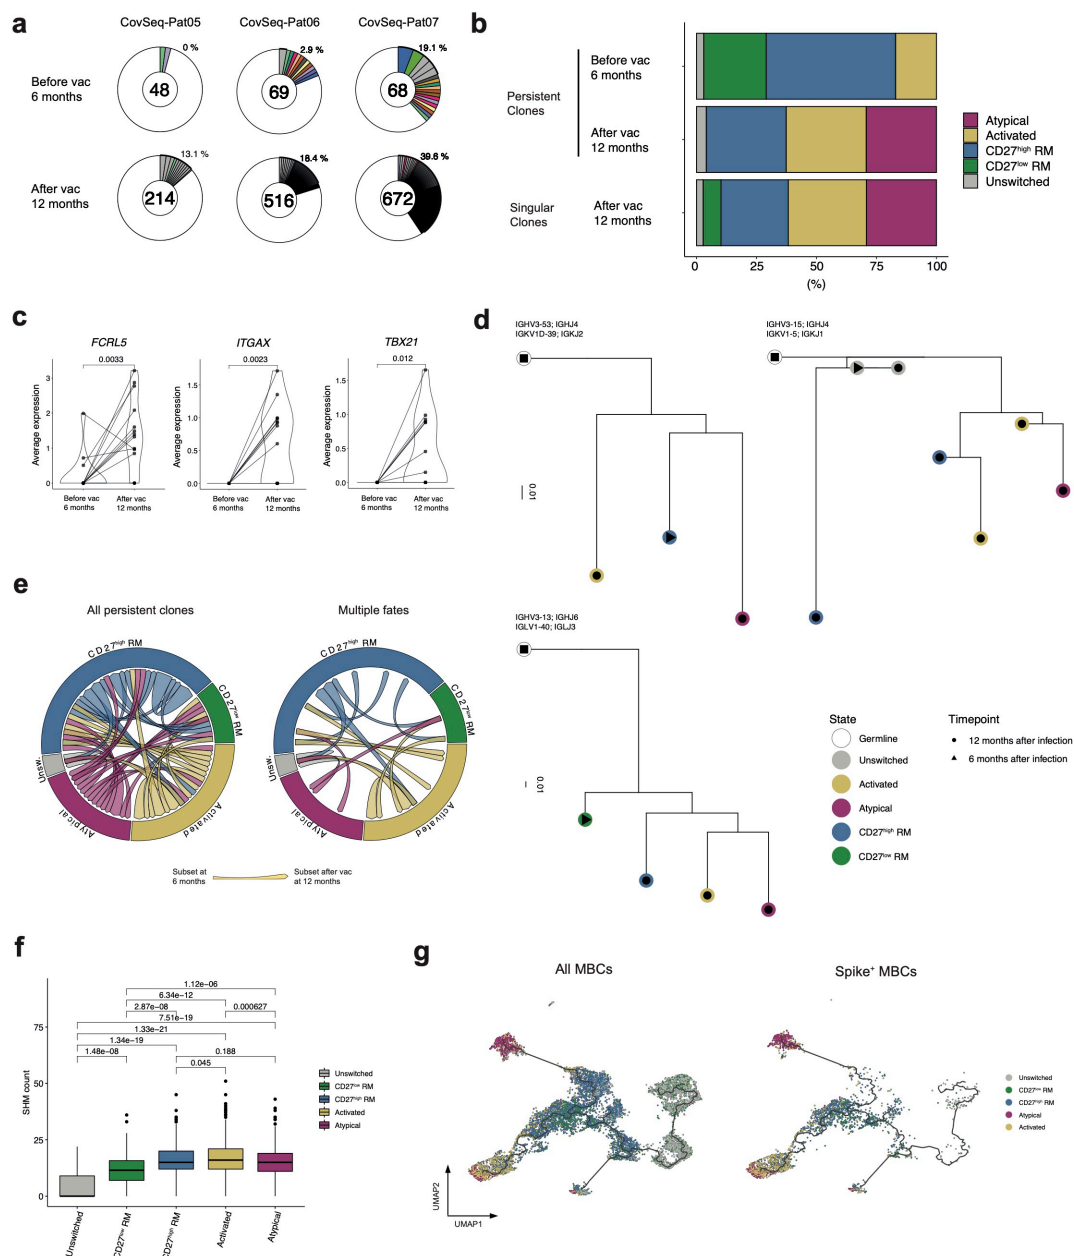

986

987 **Fig. 6. Temporal analysis of B cell receptors in SARS-CoV-2-specific MBC**  
 988 **subsets.**

989 **a**, Donut plots of B cell receptor (BCR) sequences of spike<sup>+</sup> MBCs in three  
 990 representative patients before and after vaccination. Numbers in donuts indicate spike<sup>+</sup>  
 991 MBCs. Gray slices indicate singular clones found at one time point only, whereas  
 992 persistent clones found at both six and 12 months after infection are labeled by the same  
 993 color. White areas represent BCR sequences found in single cells only. Slice sizes  
 994 correspond to clone sizes. Percentages indicate frequencies of clonally expanded cells.

995 **b**, Distribution of spike<sup>+</sup> MBC subsets in persistent and singular clones at indicated time  
996 points. **c**, Average expression of indicated genes – before and after vaccination – in  
997 persistent clones of spike<sup>+</sup> MBCs that contained at least one atypical MBC. **d**,  
998 Exemplary dendrograms (IgPhyML B cell trees) of different MBC clones at six (dots)  
999 and 12 months (triangles) after infection. Colors indicate MBC subsets. Germline  
1000 sequences, inferred during the Immcantation pipeline, are shown in white. Branch  
1001 lengths represent mutation numbers per site between each node. VH and VL genes of  
1002 clones are indicated on top of each dendrogram. **e**, Circos plot of persistent spike<sup>+</sup> MBC  
1003 clones, with arrows connecting cells of six- with 12-month time points and coloring  
1004 according to MBC phenotype at 12 months. All clones (left) versus clones adopting  
1005 multiple MBC fates (right) are shown. **f**, SHM counts of indicated spike<sup>+</sup> MBC subsets.  
1006 **g**, UMAP representation of Monocle 3 analysis of all (left) and spike<sup>+</sup> MBCs (right).  
1007 Colors indicate MBC subsets. Black lines indicate trajectory.  
1008 Samples were compared using paired t test (**c**) or two-sided Wilcoxon test (**f**). Holm–  
1009 Bonferroni method was used for p value adjustment of multiple comparisons.  
1010

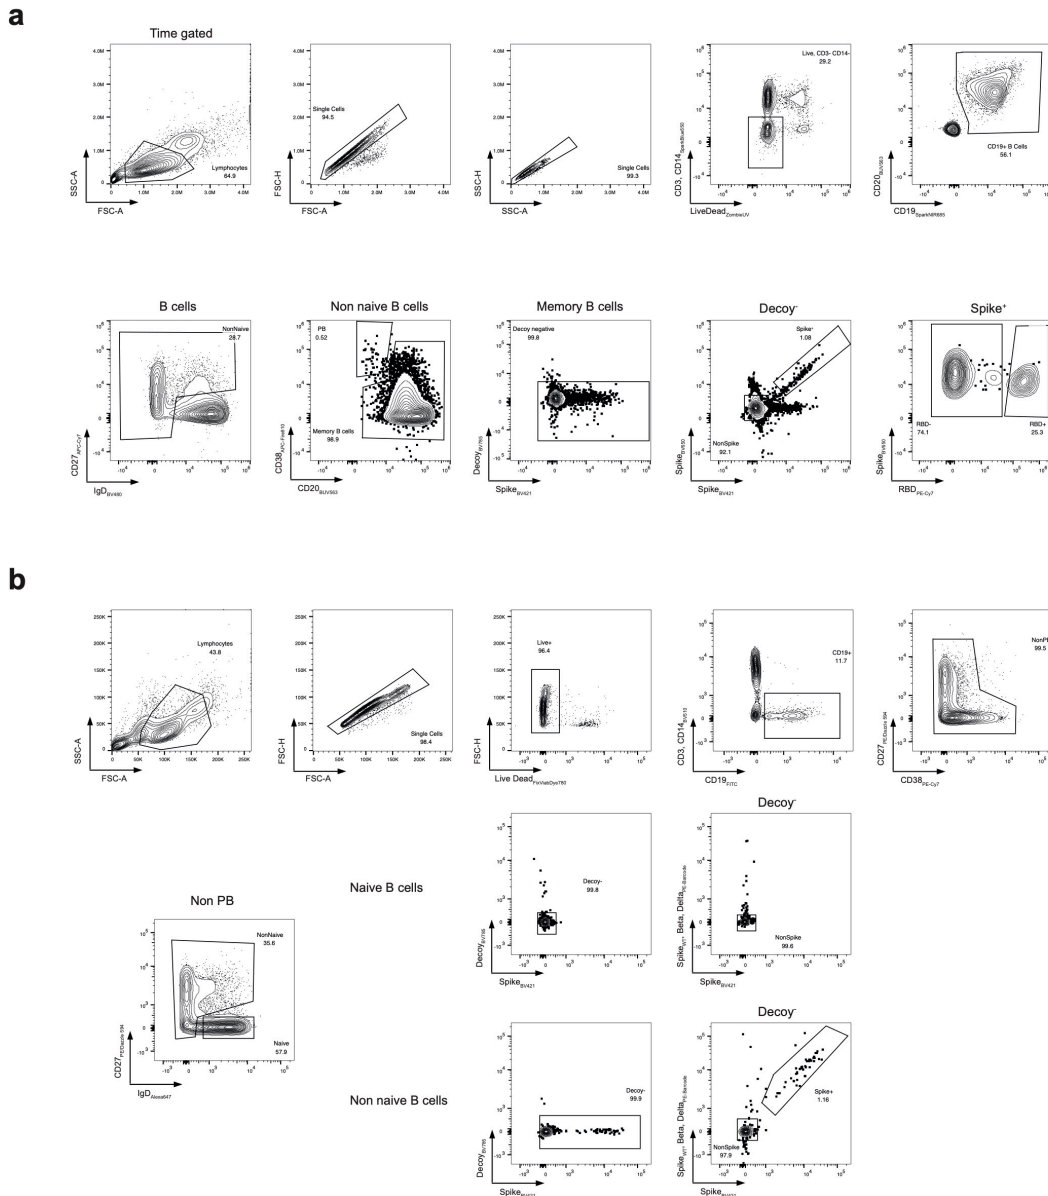

1011

1012 **Supplementary Figure 1. Flow cytometry gating strategies for SARS-CoV-2 spike-**  
 1013 **specific MBCs.**

1014 **a**, Gating strategy for SARS-CoV-2 spike<sup>+</sup> and RBD<sup>+</sup> memory B cells. **b**, Sorting

1015 strategy for SARS-CoV-2 specific and non-specific memory B cells as well as naive B

1016 cell

1017

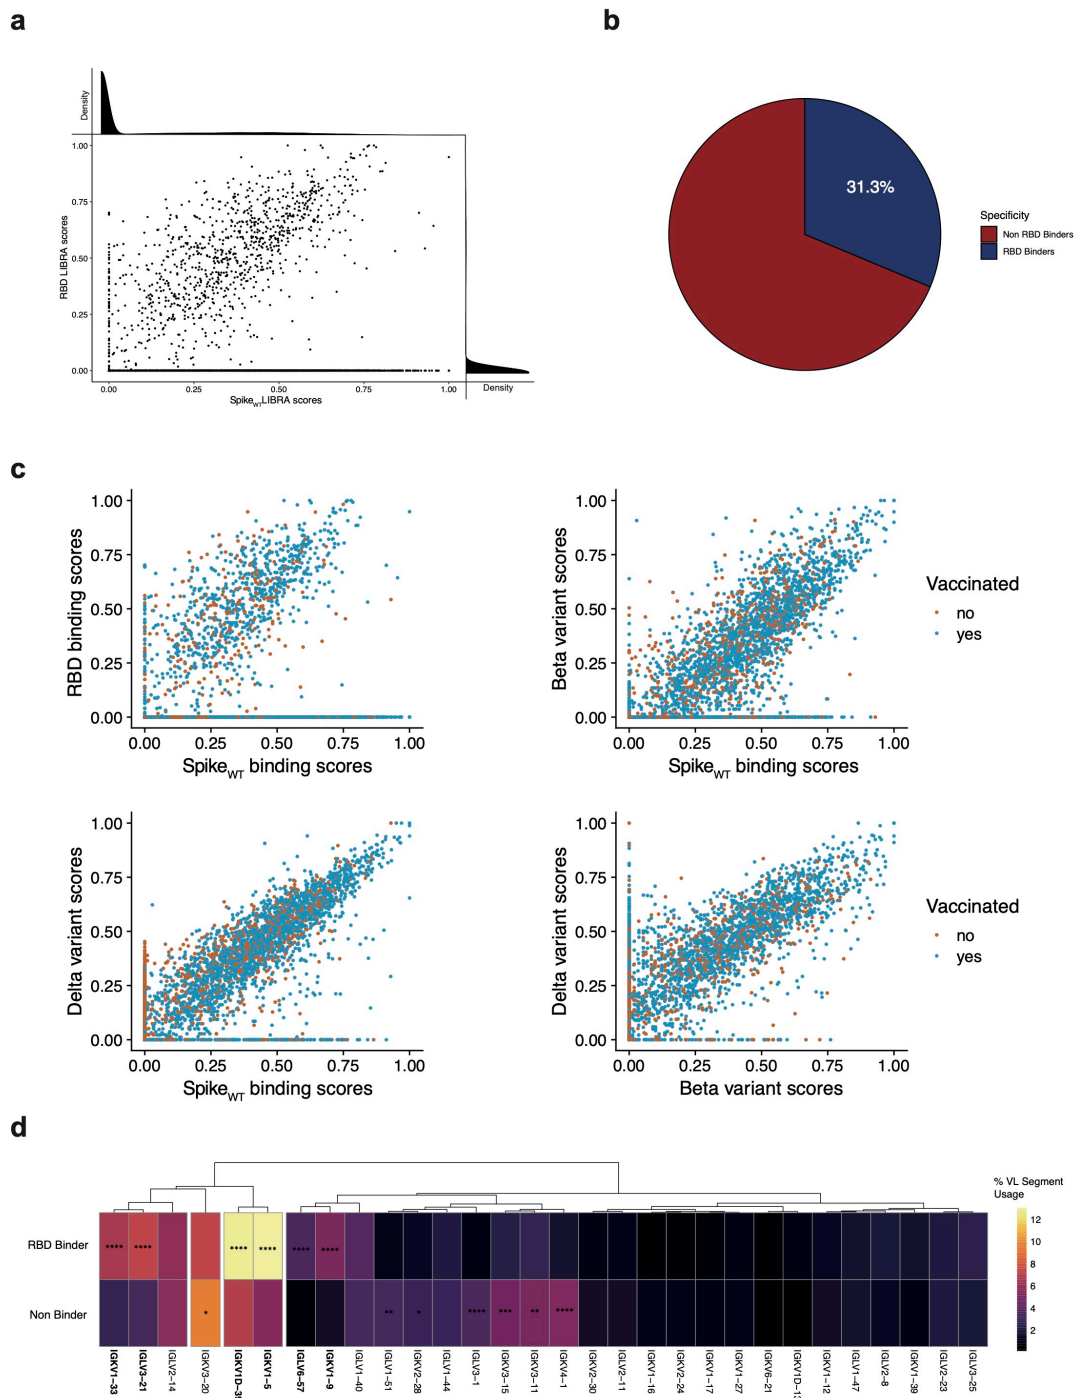

1018

1019 **Supplementary Figure 2. Identification of SARS-CoV-2 spike, RBD and spike**  
 1020 **variant specific MBCs using scRNA-seq.**

1021 **a**, Scatter plot comparing LIBRA scores for spike<sub>WT</sub> and RBD, where every dot

1022 represents a cell. Density plots indicating count distributions across LIBRA score

1023 ranges are shown for both antigens. **b**, Pie chart showing the percentage of spike<sub>WT</sub>

1024 binders which also bind RBD in the scRNA-seq dataset. **c**, Scatter plots as in **a** showing  
1025 LIBRA scores for indicated antigen baiting constructs against each other. **d**, Heatmap  
1026 comparing the V light (VL) gene usage between RBD binders and non-binders. VL  
1027 segments are sorted by a hierarchical clustering. Colors indicate the frequency within  
1028 the RBD binders resp. non-binders. The 30 most frequently used segments among RBD  
1029 binders are shown

1030 In **d** frequencies were compared using a two-proportions z-test with a Bonferroni based  
1031 multiple testing correction. P-values are shown if significant ( $p < 0.05$ ). \* $p < 0.05$ ,  
1032 \*\* $p < 0.01$ , \*\*\* $p < 0.001$ , \*\*\*\* $p < 0.0001$ .

1033

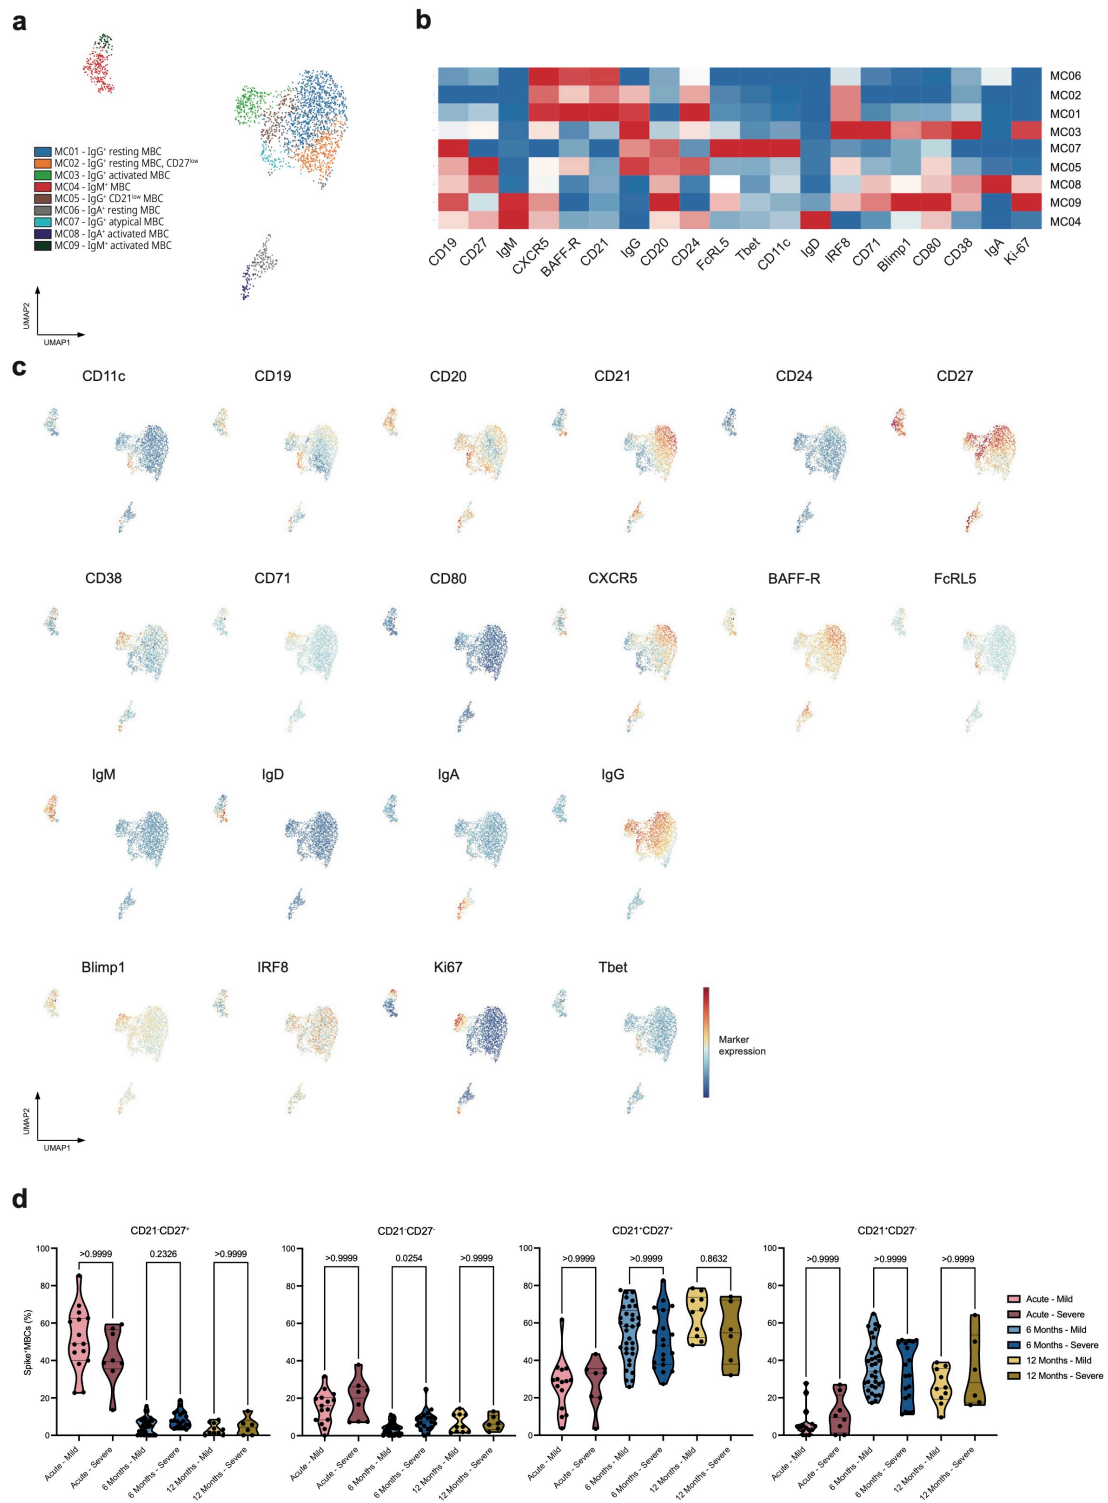

1034

1035 **Supplementary Figure 3. Unsupervised analysis of circulating MBCs after SARS-**  
1036 **CoV-2 infection.**

1037 **a**, UMAP plot of spike<sup>+</sup> MBCs of all samples which were not vaccinated (n=120),  
1038 subsampled to maximally 25 cells per sample and colored by clusters identified with a

1039 PhenoGraph algorithm. Clusters were manually annotated. **b**, Heatmap of the  
1040 normalized marker expression from the PhenoGraph clusters. **c**, UMAP as in **a** colored  
1041 by the indicated marker expression. **d**, Violin plots comparing frequencies of CD21<sup>-</sup>  
1042 CD27<sup>+</sup>, CD21<sup>-</sup>CD27<sup>-</sup>, CD21<sup>+</sup>CD27<sup>+</sup> and CD21<sup>+</sup>CD27<sup>-</sup> subsets in spike<sup>+</sup> MBCs  
1043 separated by disease severity and time points after infection. Mild (acute n=15, six  
1044 months n=33, 12 months n=10) and severe COVID-19 (acute n=8, six months n=19, 12  
1045 months n=6) were compared between the same time point using a Kruskal-Wallis test  
1046 with a Dunn's multiple comparison correction, adjusted p-values are shown.  
1047



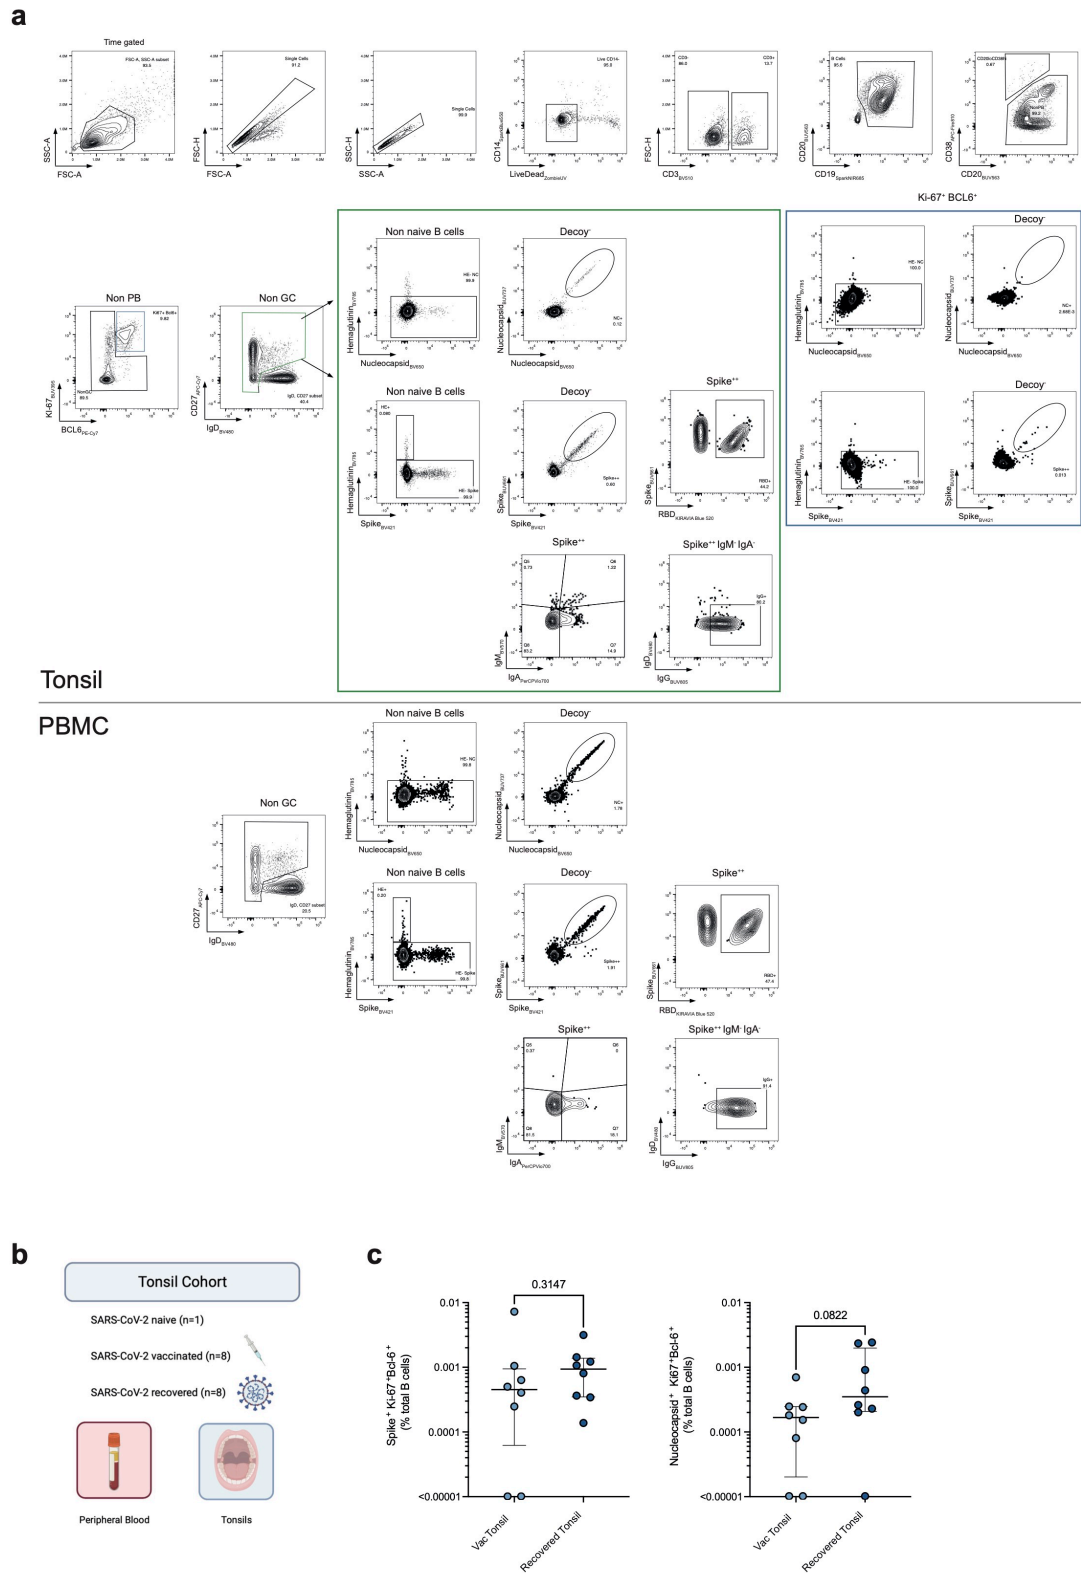

1048

1049 **Supplementary Figure 4. Gating strategy and analysis of tonsillar and circulating**

1050 **B cells.**

1051 **a**, Gating strategy for the identification of SARS-CoV-2 spike and nucleocapsid-  
1052 specific germinal center and memory B cells. Shown is the tonsil (top) and the paired  
1053 peripheral blood sample (bottom) from a COVID-19 recovered individual (CoV-  
1054 Tissue-02). **b**, Tonsil study cohort overview. **c**, Frequency of spike<sup>+</sup> (left) and  
1055 nucleocapsid<sup>+</sup> (right) germinal center B cells of total B cells in tonsils of SARS-CoV-  
1056 2 vaccinated and COVID-19 recovered individuals. Frequencies were compared using  
1057 a Mann Whitney test.  
1058

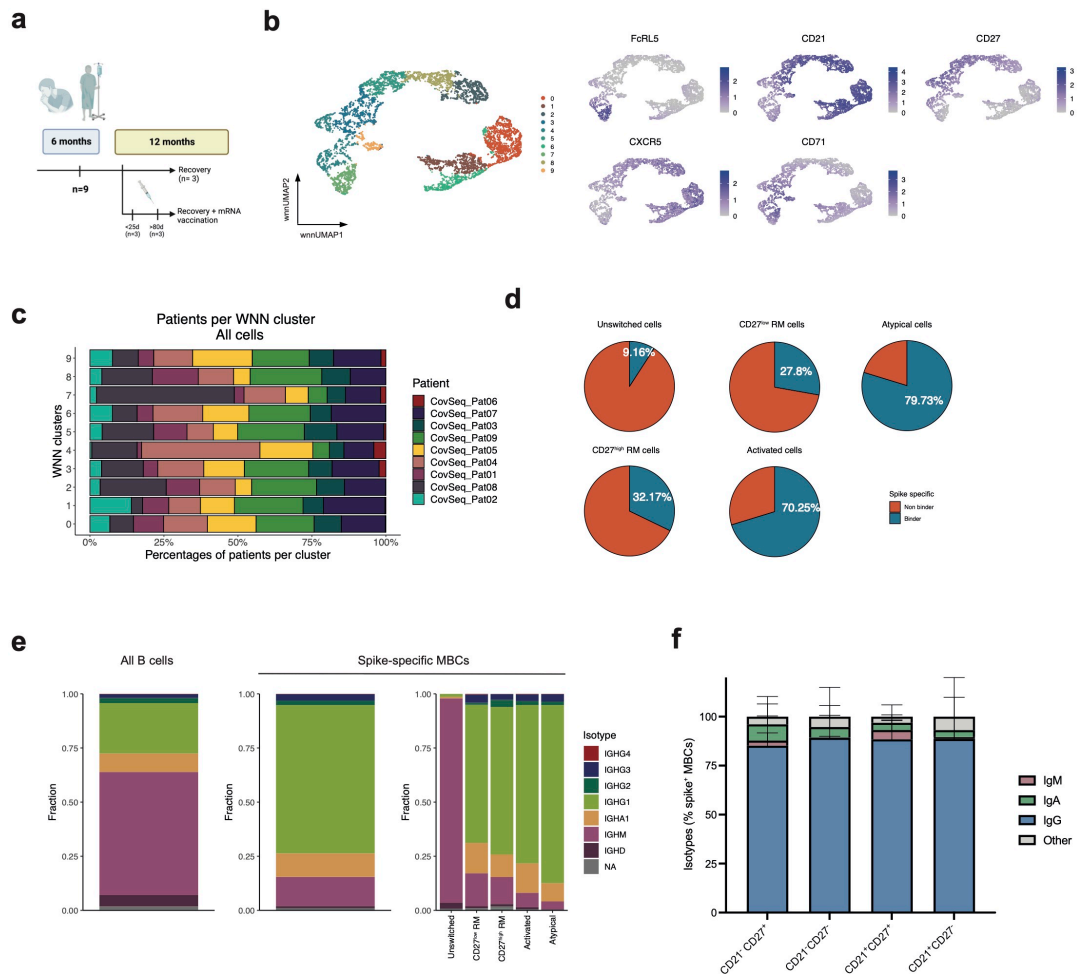

1059

1060 **Supplementary Figure 5. SARS-CoV-2-specific MBC subset identification by**  
 1061 **scRNA-seq analysis.**

1062 **a**, scRNA-seq subcohort overview. **b**, Weighted-nearest neighbor UMAP (wnnUMAP)  
 1063 of MBCs from COVID-19 patients at six and at 12 months after infection, colored by  
 1064 clustering based on single-cell transcriptome and cell surface protein information (left)  
 1065 and UMAP colored by indicated surface protein markers (right). **c**, Stacked bar graph  
 1066 showing the single patient contribution to the wnn clusters. **d**, Pie charts showing the  
 1067 percentages of spike<sup>+</sup> MBCs among all cells in the dataset, separated by MBC subset.  
 1068 **e**, Stacked bar graph showing the isotype and subtype usage in the scRNA-seq dataset  
 1069 on all B cells (left), all spike<sup>+</sup> (middle) and spike<sup>+</sup> MBC subsets (right). **f**, Stacked bar

1070 graph showing the isotype usage in the spike<sup>+</sup> MBC subset from the flow cytometry

1071 dataset (n=41).

1072

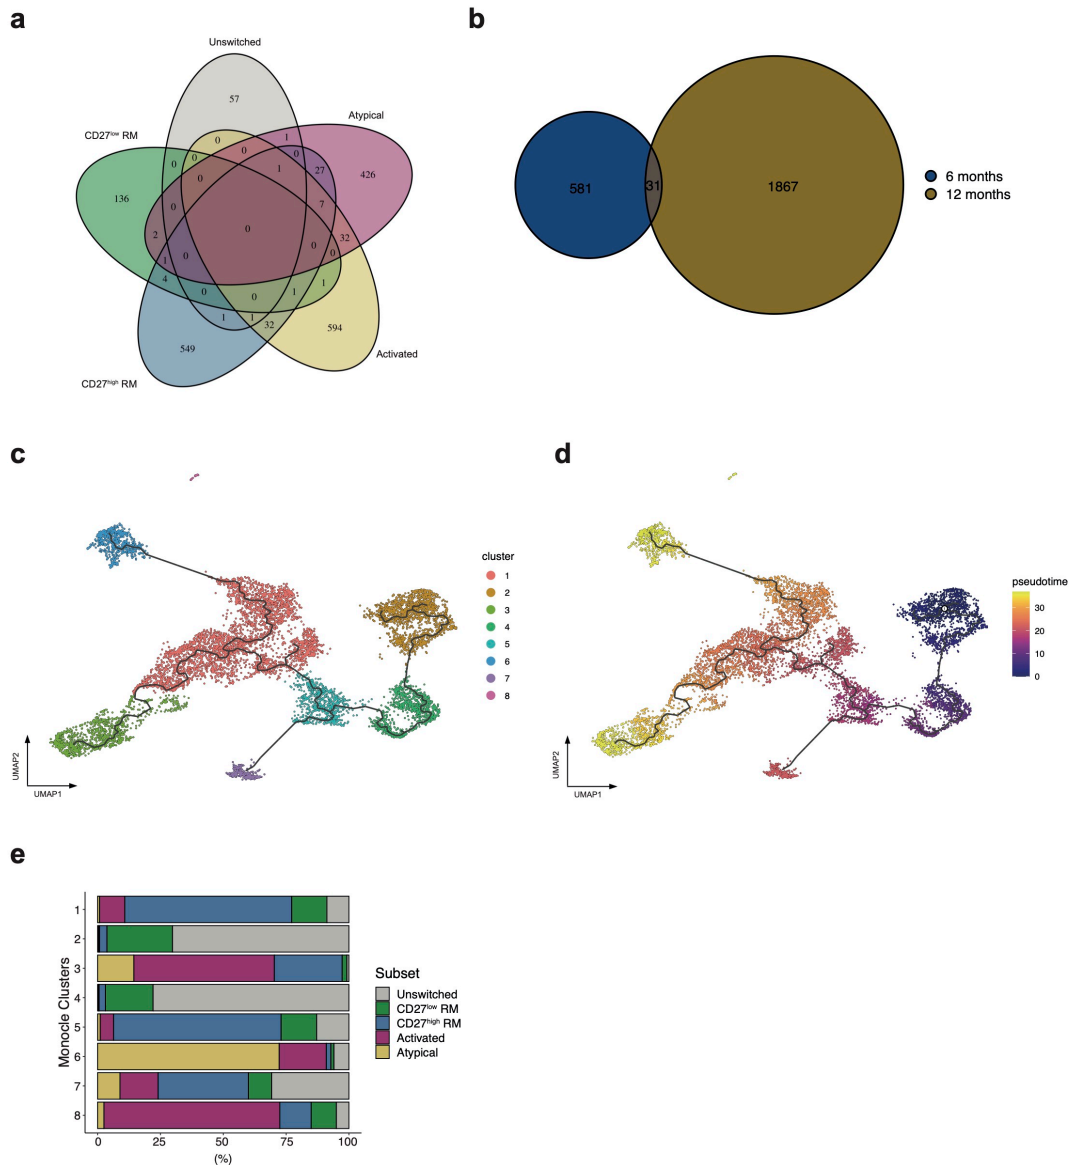

1073

1074 **Supplementary Figure 6. scRNA-seq clonal analysis and Monocle analysis.**

1075 **a**, Venn diagram showing the clonal overlap of SARS-CoV-2 specific clones in the  
 1076 different MBC subsets. **B**, Venn diagram showing the clonal overlap of SARS-CoV-2  
 1077 specific clones 6 and 12 months after SARS-CoV-2 infection **c**, UMAP representation  
 1078 of a Monocle analysis on all memory B cells colored by clusters identified via the  
 1079 Monocle algorithm. **d**, UMAP as in **c** colored by a pseudotime annotation. The  
 1080 beginning of the pseudotime was manually set inside the partition with mostly  
 1081 unswitched cells. **e**, Stacked bar graph showing the contribution of SARS-CoV-2  
 1082 specific MBC subsets to the clusters derived from Monocle.
